# Supplementary material
Source: publisher site journal article supplement (https://www.spandidos-publications.com/2949/downloadSupplementary)
Supplement: Supplementary file 2 [file downloadSupplementary]

## Sheet: Table S4 GO-Cellular_Component
Table SV. GO-Cellular Component
GOCCID	Term	Sample number	Background number	Pvalue	corrPvalue	GeneIDs	GeneNames
GO:0005615	extracellular space	137	881	9.20208e-16	4.52742e-13	688605;362619;24498;113901;24493;24310;245920;24795;29692;29610;84491;498335;305253;266775;66015;25453;312705;60350;310693;29687;29455;290757;24464;100365043;58812;83781;292306;25524;362634;25728;406864;500590;117254;116637;24571;100911545;25375;60582;81503;84032;24476;24778;116510;24770;24773;25425;171112;63849;89824;360228;680312;25732;25046;171569;315615;100360977;29221;114105;24366;24367;2459…	Ccl1;Smpdl3b;Il6;Chia;Il1a;Ace;Cxcl10;Serpina3n;Pla2g2a;Tgfbr3;Qsox1;Cxcl13;Adamts3;Serpinb10;Adamts4;Gdnf;C1r;Cd14;Cd5l;C1qb;Gdf15;F11;Hp;LOC100365043;Apln;Lgals3;Rnaset2;Psap;C1qc;Apoe;Clic1;Tnfrsf9;Prdx1;Ccl4;Muc1;LOC100911545;Aldh3a1;Il1rn;Cxcl1;Col3a1;Iapp;Slc2a1;Timp1;Ccl2;Sftpa1;Ctsh;Wfdc1;Mmp8;Chi3l1;Wfdc21;Hist1h2bk;Acp5;Pigr;Spon2;Dscaml1;LOC100360977;Arg1;Cxcl2;Fgb;Fgg;Lgals3bp;Pf4;Kng…
GO:0000786	nucleosome	29	81	5.6306e-11	9.23418e-09	684762;100910554;64647;680615;680322;291159;684841;100359692;100912290;291157;306970;680522;100910200;502125;298850;100360754;502129;291145;361247;680097;58940;500987;310678;680312;291100;100360950;306962;691488;100365043	LOC684762;LOC100910554;Hist1h2bl;Hist1h2ak;LOC680322;Hist1h2ail;LOC684841;LOC100359692;LOC100912290;Hist1h2bo;Hist1h2an;Hist1h1b;LOC100910200;Hist1h2ah;Cenpa;LOC100360754;Hist1h2ai;Hist1h1a;Hist1h2bd;LOC680097;H2afz;H2afx;Hist2h3c2;Hist1h2bk;Irf4;LOC100360950;Hist1h2ac;Hist3h2bb;LOC100365043
GO:1990104	DNA bending complex	29	81	5.6306e-11	9.23418e-09	684762;100910554;64647;680615;680322;291159;684841;100359692;100912290;291157;306970;680522;100910200;502125;298850;100360754;502129;291145;361247;680097;58940;500987;310678;680312;291100;100360950;306962;691488;100365043	LOC684762;LOC100910554;Hist1h2bl;Hist1h2ak;LOC680322;Hist1h2ail;LOC684841;LOC100359692;LOC100912290;Hist1h2bo;Hist1h2an;Hist1h1b;LOC100910200;Hist1h2ah;Cenpa;LOC100360754;Hist1h2ai;Hist1h1a;Hist1h2bd;LOC680097;H2afz;H2afx;Hist2h3c2;Hist1h2bk;Irf4;LOC100360950;Hist1h2ac;Hist3h2bb;LOC100365043
GO:0044815	DNA packaging complex	29	85	1.43573e-10	1.76595e-08	684762;100910554;64647;680615;680322;291159;684841;100359692;100912290;291157;306970;680522;100910200;502125;298850;100360754;502129;291145;361247;680097;58940;500987;310678;680312;291100;100360950;306962;691488;100365043	LOC684762;LOC100910554;Hist1h2bl;Hist1h2ak;LOC680322;Hist1h2ail;LOC684841;LOC100359692;LOC100912290;Hist1h2bo;Hist1h2an;Hist1h1b;LOC100910200;Hist1h2ah;Cenpa;LOC100360754;Hist1h2ai;Hist1h1a;Hist1h2bd;LOC680097;H2afz;H2afx;Hist2h3c2;Hist1h2bk;Irf4;LOC100360950;Hist1h2ac;Hist3h2bb;LOC100365043
GO:0044421	extracellular region part	284	2802	3.366e-09	3.31214e-07	499342;317676;684984;140868;298185;290562;688605;362619;24498;113901;29213;84387;499099;24493;100912290;24310;245920;50719;361422;291437;24392;24778;246118;24770;315298;24795;29692;502125;304988;289185;29610;24962;83731;306071;29292;502129;84491;498335;305253;294257;252929;315926;292699;287885;191575;66015;25453;304913;24787;54282;363265;100360950;292848;24773;79242;293186;310693;50671;25544;2968…	Cd274;Lat2;Cd300lg;Fabp5;Frem1;Sema3g;Ccl1;Smpdl3b;Il6;Chia;Tubb4a;Pglyrp1;Cd177;Il1a;LOC100912290;Ace;Cxcl10;Slc7a5;Cotl1;Lipg;Gja1;Slc2a1;Tubb3;Ccl2;Racgap1;Serpina3n;Pla2g2a;Hist1h2ah;Mnda;Creg1;Tgfbr3;Cth;Kcnma1;Lcp1;Ftl1;Hist1h2ai;Qsox1;Cxcl13;Adamts3;Cfb;Ctsz;Pls1;Cblc;Sectm1a;Nme1;Adamts4;Gdnf;Tnn;Sod2;Padi1;Col4a3;LOC100360950;Klk13;Sftpa1;Hpgd;Lyve1;Cd5l;Fasn;Sele;C1qb;Gdf15;F11;Hist1h2a…
GO:0005576	extracellular region	314	3169	4.26834e-09	3.50004e-07	499342;317676;684984;140868;360579;65154;688605;500991;362619;24498;113901;29213;287610;84387;499465;24493;100912290;24310;245920;50719;361422;291437;24392;306970;24778;246118;24770;315298;24795;29692;502125;304988;289185;29610;24962;83731;85266;306071;29292;502129;84491;498335;305253;294257;252929;315926;65161;292699;287885;66014;66015;25453;304913;24787;54282;363265;100360950;292848;24773;79242…	Cd274;Lat2;Cd300lg;Fabp5;Ccl9;Wisp1;Ccl1;Fam55b;Smpdl3b;Il6;Chia;Tubb4a;Lpo;Pglyrp1;Mettl24;Il1a;LOC100912290;Ace;Cxcl10;Slc7a5;Cotl1;Lipg;Gja1;Hist1h2an;Slc2a1;Tubb3;Ccl2;Racgap1;Serpina3n;Pla2g2a;Hist1h2ah;Mnda;Creg1;Tgfbr3;Cth;Kcnma1;Prss12;Lcp1;Ftl1;Hist1h2ai;Qsox1;Cxcl13;Adamts3;Cfb;Ctsz;Pls1;Litaf;Cblc;Sectm1a;Impg1;Adamts4;Gdnf;Tnn;Sod2;Padi1;Col4a3;LOC100360950;Klk13;Sftpa1;Hpgd;Lyve1;Cd5…
GO:0032993	protein-DNA complex	30	127	8.98702e-08	6.31659e-06	684762;100910554;64647;680615;680322;291159;65199;684841;100359692;100912290;291157;306970;680522;100910200;502125;298850;100360754;502129;291145;361247;680097;58940;500987;310678;680312;291100;100360950;306962;691488;100365043	LOC684762;LOC100910554;Hist1h2bl;Hist1h2ak;LOC680322;Hist1h2ail;Kcnip3;LOC684841;LOC100359692;LOC100912290;Hist1h2bo;Hist1h2an;Hist1h1b;LOC100910200;Hist1h2ah;Cenpa;LOC100360754;Hist1h2ai;Hist1h1a;Hist1h2bd;LOC680097;H2afz;H2afx;Hist2h3c2;Hist1h2bk;Irf4;LOC100360950;Hist1h2ac;Hist3h2bb;LOC100365043
GO:0072562	blood microparticle	23	85	3.68919e-07	2.26885e-05	362634;25728;406864;310693;294257;24366;296654;24232;100911545;24367;295703;24795;24778;24614;312705;117512;192262;306251;245955;24464;29687;29437;406161	C1qc;Apoe;Clic1;Cd5l;Cfb;Fgb;Gsn;C3;LOC100911545;Fgg;Serping1;Serpina3n;Slc2a1;Orm1;C1r;C9;C1s;Itih1;Lgals3bp;Hp;C1qb;Acta1;C4b
GO:0031982	vesicle	262	2755	1.41505e-06	7.7356e-05	499342;317676;684984;140868;60566;29599;29213;84387;499099;315215;310678;100912290;24310;50719;361422;60350;24392;29465;246118;303801;315298;24795;29692;502125;304988;289185;29610;24962;497009;85266;306071;29292;502129;84491;365042;305253;294257;252929;315926;117558;287885;191575;312705;24787;54282;24770;100360950;362619;24773;79242;117038;293186;310693;50671;291159;24191;29687;29455;50568;290757…	Cd274;Lat2;Cd300lg;Fabp5;Syt8;Atp2b3;Tubb4a;Pglyrp1;Cd177;Mlc1;Hist2h3c2;LOC100912290;Ace;Slc7a5;Cotl1;Cd14;Gja1;Trpv2;Tubb3;Lamp3;Racgap1;Serpina3n;Pla2g2a;Hist1h2ah;Mnda;Creg1;Tgfbr3;Cth;Naaa;Prss12;Lcp1;Ftl1;Hist1h2ai;Qsox1;Rab32;Adamts3;Cfb;Ctsz;Pls1;Mylk2;Sectm1a;Nme1;C1r;Sod2;Padi1;Ccl2;LOC100360950;Smpdl3b;Sftpa1;Hpgd;Mt3;Lyve1;Cd5l;Fasn;Hist1h2ail;Aldoc;C1qb;Gdf15;Cspg5;F11;Hist1h2ac;Hp;L…
GO:0009897	external side of plasma membrane	34	190	3.54707e-06	0.000152979	499342;25728;25316;500590;24832;293154;25704;24498;688090;24310;245920;114587;289211;300027;29610;83731;64357;64545;56822;25651;117029;50599;361226;363060;29366;25572;691992;24366;24367;83781;29242;25589;171049;24931	Cd274;Apoe;Ms4a2;Tnfrsf9;Thy1;Folr2;Il2ra;Il6;RT1-Bb;Ace;Cxcl10;Dlk1;Fcgr2b;Gpihbp1;Tgfbr3;Kcnma1;Cd200r1;Icos;Cd86;Selp;Ccr5;Kcnj3;Cd83;Plet1;Serpine2;Tnfrsf4;Gp1ba;Fgb;Fgg;Lgals3;Car4;Kdr;Folr1;Cd8b
GO:0070062	extracellular vesicular exosome	211	2169	3.72883e-06	0.000152979	499342;317676;684984;140868;362619;29213;84387;499099;100912290;24310;50719;361422;60350;24392;24778;246118;315298;24795;29692;502125;304988;289185;29610;24962;497009;306071;29292;502129;84491;24191;305253;294257;252929;315926;292699;287885;191575;312705;24787;54282;100360950;292848;79242;293186;310693;50671;29687;29455;290757;306962;24464;100365043;499926;24366;288512;83781;292306;309304;25524;3…	Cd274;Lat2;Cd300lg;Fabp5;Smpdl3b;Tubb4a;Pglyrp1;Cd177;LOC100912290;Ace;Slc7a5;Cotl1;Cd14;Gja1;Slc2a1;Tubb3;Racgap1;Serpina3n;Pla2g2a;Hist1h2ah;Mnda;Creg1;Tgfbr3;Cth;Naaa;Lcp1;Ftl1;Hist1h2ai;Qsox1;Aldoc;Adamts3;Cfb;Ctsz;Pls1;Cblc;Sectm1a;Nme1;C1r;Sod2;Padi1;LOC100360950;Klk13;Hpgd;Lyve1;Cd5l;Fasn;C1qb;Gdf15;F11;Hist1h2ac;Hp;LOC100365043;Bpifb1;Fgb;Elfn1;Lgals3;Rnaset2;Pdcd1lg2;Psap;C1qc;Apoe;Clic1…
GO:0065010	extracellular membrane-bounded organelle	211	2172	4.04213e-06	0.000152979	499342;317676;684984;140868;362619;29213;84387;499099;100912290;24310;50719;361422;60350;24392;24778;246118;315298;24795;29692;502125;304988;289185;29610;24962;497009;306071;29292;502129;84491;24191;305253;294257;252929;315926;292699;287885;191575;312705;24787;54282;100360950;292848;79242;293186;310693;50671;29687;29455;290757;306962;24464;100365043;499926;24366;288512;83781;292306;309304;25524;3…	Cd274;Lat2;Cd300lg;Fabp5;Smpdl3b;Tubb4a;Pglyrp1;Cd177;LOC100912290;Ace;Slc7a5;Cotl1;Cd14;Gja1;Slc2a1;Tubb3;Racgap1;Serpina3n;Pla2g2a;Hist1h2ah;Mnda;Creg1;Tgfbr3;Cth;Naaa;Lcp1;Ftl1;Hist1h2ai;Qsox1;Aldoc;Adamts3;Cfb;Ctsz;Pls1;Cblc;Sectm1a;Nme1;C1r;Sod2;Padi1;LOC100360950;Klk13;Hpgd;Lyve1;Cd5l;Fasn;C1qb;Gdf15;F11;Hist1h2ac;Hp;LOC100365043;Bpifb1;Fgb;Elfn1;Lgals3;Rnaset2;Pdcd1lg2;Psap;C1qc;Apoe;Clic1…
GO:0043230	extracellular organelle	211	2172	4.04213e-06	0.000152979	499342;317676;684984;140868;362619;29213;84387;499099;100912290;24310;50719;361422;60350;24392;24778;246118;315298;24795;29692;502125;304988;289185;29610;24962;497009;306071;29292;502129;84491;24191;305253;294257;252929;315926;292699;287885;191575;312705;24787;54282;100360950;292848;79242;293186;310693;50671;29687;29455;290757;306962;24464;100365043;499926;24366;288512;83781;292306;309304;25524;3…	Cd274;Lat2;Cd300lg;Fabp5;Smpdl3b;Tubb4a;Pglyrp1;Cd177;LOC100912290;Ace;Slc7a5;Cotl1;Cd14;Gja1;Slc2a1;Tubb3;Racgap1;Serpina3n;Pla2g2a;Hist1h2ah;Mnda;Creg1;Tgfbr3;Cth;Naaa;Lcp1;Ftl1;Hist1h2ai;Qsox1;Aldoc;Adamts3;Cfb;Ctsz;Pls1;Cblc;Sectm1a;Nme1;C1r;Sod2;Padi1;LOC100360950;Klk13;Hpgd;Lyve1;Cd5l;Fasn;C1qb;Gdf15;F11;Hist1h2ac;Hp;LOC100365043;Bpifb1;Fgb;Elfn1;Lgals3;Rnaset2;Pdcd1lg2;Psap;C1qc;Apoe;Clic1…
GO:0044427	chromosomal part	68	527	5.05666e-06	0.00017117	171576;316129;500545;293733;64647;84396;680615;689399;24890;117254;304648;64041;684771;25448;25203;301701;100359692;100912290;24571;291157;293502;296344;306970;361623;100910200;311325;502125;499933;363198;100360754;171529;288242;502129;291145;361247;680097;58940;155430;500987;684841;310678;680312;291100;684762;100910554;361416;114482;311723;100360950;680322;25515;502372;288272;366126;291159;29613…	Bub1b;Uhrf1;Cdca8;Incenp;Hist1h2bl;Atp1b4;Hist1h2ak;Cenpw;Esr1;Prdx1;Asf1b;Birc5;Cdca5;Cenpi;Ccnb1;Ndc80;LOC100359692;LOC100912290;Muc1;Hist1h2bo;Kif22;Mybl2;Hist1h2an;Trim66;LOC100910200;Knstrn;Hist1h2ah;Dsn1;Cenpq;LOC100360754;Kif2c;Chaf1b;Hist1h2ai;Hist1h1a;Hist1h2bd;LOC680097;H2afz;Hey2;H2afx;LOC684841;Hist2h3c2;Hist1h2bk;Irf4;LOC684762;LOC100910554;Cenpn;Nek2;Sox18;LOC100360950;LOC680322;Plk…
GO:0031988	membrane-bounded vesicle	251	2673	5.21861e-06	0.00017117	499342;317676;684984;140868;60566;362619;29213;84387;499099;310678;100912290;24310;50719;361422;60350;24392;29465;246118;303801;315298;24795;29692;502125;304988;289185;29610;24962;497009;306071;29292;502129;84491;365042;305253;294257;252929;315926;117558;287885;191575;312705;24787;54282;24770;100360950;292848;79242;293186;310693;50671;50568;24191;29687;29455;290757;306962;24464;100365043;81707;25…	Cd274;Lat2;Cd300lg;Fabp5;Syt8;Smpdl3b;Tubb4a;Pglyrp1;Cd177;Hist2h3c2;LOC100912290;Ace;Slc7a5;Cotl1;Cd14;Gja1;Trpv2;Tubb3;Lamp3;Racgap1;Serpina3n;Pla2g2a;Hist1h2ah;Mnda;Creg1;Tgfbr3;Cth;Naaa;Lcp1;Ftl1;Hist1h2ai;Qsox1;Rab32;Adamts3;Cfb;Ctsz;Pls1;Mylk2;Sectm1a;Nme1;C1r;Sod2;Padi1;Ccl2;LOC100360950;Klk13;Hpgd;Lyve1;Cd5l;Fasn;Cspg5;Aldoc;C1qb;Gdf15;F11;Hist1h2ac;Hp;LOC100365043;Mmp14;Kdr;Bpifb1;Fgb;El…
GO:0044459	plasma membrane part	145	1403	7.72186e-06	0.000237447	29597;293650;499342;363091;293154;24498;54296;315215;684984;245920;50719;24392;29465;29695;315298;24251;315611;300027;29610;83731;29290;360034;89804;24904;89788;191573;191575;25349;298504;25694;50676;79217;289229;25544;83781;117264;81639;25589;25728;170899;500590;24832;64041;688090;25686;24571;306071;56765;29440;80900;79129;24778;81743;29639;310621;24777;64357;367315;50592;56822;63997;294269;6384…	P2ry2;Tcirg1;Cd274;Myzap;Folr2;Il6;Rgs7;Mlc1;Cd300lg;Cxcl10;Slc7a5;Gja1;Trpv2;Gabrr2;Racgap1;Cd53;Scn4b;Gpihbp1;Tgfbr3;Kcnma1;Adora1;Myrip;Tek;Slc22a1;Gna15;Grin3a;Nme1;Scn2b;Mfsd2a;Has2;Slc6a12;Gja3;Vangl2;Sele;Lgals3;P2ry6;Alox15;Kdr;Apoe;Kcnk2;Tnfrsf9;Thy1;Birc5;RT1-Bb;Gnai1;Muc1;Lcp1;Plvap;Slc26a4;Slco1a5;Cyba;Slc2a1;Pde2a;Fxyd2;Iqgap3;Slc10a1;Cd200r1;Gpr35;Gria1;Cd86;Slc29a1;RT1-Da;P2ry4;Gm2…
GO:0005694	chromosome	72	579	8.54424e-06	0.00024728	171576;316129;289777;500545;293733;64647;84396;680615;689399;680322;117254;304648;64041;684771;25448;25203;301701;497672;680097;24890;100912290;24571;291157;293502;296344;155430;306970;361623;100910200;311325;502125;499933;363198;100360754;171529;288242;502129;291145;361247;360243;58940;100359692;500987;684841;310678;680312;291100;684762;100910554;361416;114482;311723;100360950;25515;502372;28827…	Bub1b;Uhrf1;Fignl1;Cdca8;Incenp;Hist1h2bl;Atp1b4;Hist1h2ak;Cenpw;LOC680322;Prdx1;Asf1b;Birc5;Cdca5;Cenpi;Ccnb1;Ndc80;Brca1;LOC680097;Esr1;LOC100912290;Muc1;Hist1h2bo;Kif22;Mybl2;Hey2;Hist1h2an;Trim66;LOC100910200;Knstrn;Hist1h2ah;Dsn1;Cenpq;LOC100360754;Kif2c;Chaf1b;Hist1h2ai;Hist1h1a;Hist1h2bd;Top2a;H2afz;LOC100359692;H2afx;LOC684841;Hist2h3c2;Hist1h2bk;Irf4;LOC684762;LOC100910554;Cenpn;Nek2;Sox…
GO:0000777	condensed chromosome kinetochore	14	45	1.86956e-05	0.000509748	171576;298850;296137;291441;304951;311325;689399;171529;499933;64041;361416;25203;301701;25515	Bub1b;Cenpa;Bub1;Ska1;Nuf2;Knstrn;Cenpw;Kif2c;Dsn1;Birc5;Cenpn;Ccnb1;Ndc80;Plk1
GO:0000775	chromosome, centromeric region	22	104	1.96854e-05	0.000509748	171576;293733;689399;64041;25448;25203;301701;294071;311325;499933;363198;25515;171529;298850;114482;288272;361416;500545;296137;291441;304951;305827	Bub1b;Incenp;Cenpw;Birc5;Cenpi;Ccnb1;Ndc80;Hells;Knstrn;Dsn1;Cenpq;Plk1;Kif2c;Cenpa;Nek2;Mis18a;Cenpn;Cdca8;Bub1;Ska1;Nuf2;Wdhd1
GO:0005578	proteinaceous extracellular matrix	31	188	3.74476e-05	0.000921211	170568;25350;25335;245955;690625;81682;117033;81687;298185;84032;292406;29610;363265;24773;29393;114122;305253;63849;116640;25654;116510;171569;304913;60379;64057;24482;311827;66015;287526;282836;83781	Dmbt1;Sftpd;Mmp7;Lgals3bp;Oc90;Lum;Mmp12;Mmp9;Frem1;Col3a1;Thbs2;Tgfbr3;Col4a3;Sftpa1;Col1a1;Vcan;Adamts3;Mmp8;Tnc;Col11a1;Timp1;Spon2;Tnn;Col5a3;Hapln2;Igf1;Adamtsl2;Adamts4;Serpinf1;Cthrc1;Lgals3
GO:0000779	condensed chromosome, centromeric region	14	49	4.11281e-05	0.000963573	171576;298850;296137;291441;304951;311325;689399;171529;499933;64041;361416;25203;301701;25515	Bub1b;Cenpa;Bub1;Ska1;Nuf2;Knstrn;Cenpw;Kif2c;Dsn1;Birc5;Cenpn;Ccnb1;Ndc80;Plk1
GO:0031012	extracellular matrix	39	268	5.0465e-05	0.00112858	170568;25350;25728;25335;287526;690625;81682;117033;304608;81687;64057;298185;29569;84032;292406;29610;85266;363265;24773;81707;29393;114122;305253;63849;116640;25654;116510;66015;304913;60379;29366;171569;29268;24482;311827;83781;245955;282836;25627	Dmbt1;Sftpd;Apoe;Mmp7;Serpinf1;Oc90;Lum;Mmp12;Mmp19;Mmp9;Hapln2;Frem1;Pcolce;Col3a1;Thbs2;Tgfbr3;Prss12;Col4a3;Sftpa1;Mmp14;Col1a1;Vcan;Adamts3;Mmp8;Tnc;Col11a1;Timp1;Adamts4;Tnn;Col5a3;Serpine2;Spon2;Tpsb2;Igf1;Adamtsl2;Lgals3;Lgals3bp;Cthrc1;Cma1
GO:0005581	collagen trimer	14	51	5.93608e-05	0.00126981	362634;298566;29687;84032;315114;25350;362584;60379;363265;282836;81682;24773;25654;29393	C1qc;C1qa;C1qb;Col3a1;C1qtnf6;Sftpd;Col9a2;Col5a3;Col4a3;Cthrc1;Lum;Sftpa1;Col11a1;Col1a1
GO:0009986	cell surface	65	544	6.53701e-05	0.00134009	499342;25728;25316;289596;500590;24832;293154;25704;24498;64545;170913;688090;24571;24310;245920;114587;24493;56822;29465;315298;192211;24251;300027;29610;83731;29366;315615;64357;89804;25054;50592;58966;56765;294269;24807;113959;362800;25651;363060;50599;361226;304913;245977;117029;29186;294074;60350;310392;25572;361537;691992;24366;24367;83781;289211;29242;24988;81651;679787;29143;25589;171049;…	Cd274;Apoe;Ms4a2;Corin;Tnfrsf9;Thy1;Folr2;Il2ra;Il6;Icos;Abcb1a;RT1-Bb;Muc1;Ace;Cxcl10;Dlk1;Il1a;Cd86;Trpv2;Racgap1;Prom2;Cd53;Gpihbp1;Tgfbr3;Kcnma1;Serpine2;Dscaml1;Cd200r1;Tek;Ntrk2;Gria1;Ramp2;Plvap;RT1-Da;Tacr1;C5ar1;Itgb8;Selp;Plet1;Kcnj3;Cd83;Tnn;Gpr116;Ccr5;Cd63;Cep55;Cd14;Slc7a11;Tnfrsf4;Tyrobp;Gp1ba;Fgb;Fgg;Lgals3;Fcgr2b;Car4;RT1-M2;Cspg4;Clec5a;Grn;Kdr;Folr1;Ctss;Cd8b;Enpp3
GO:0098552	side of membrane	36	246	8.64325e-05	0.00170099	499342;25728;25316;500590;24832;293154;25704;24498;688090;24310;245920;114587;289211;300027;29610;83731;64357;64545;56822;25651;117029;50599;361226;363060;29366;25572;691992;24366;24367;83781;29242;246781;282838;25589;171049;24931	Cd274;Apoe;Ms4a2;Tnfrsf9;Thy1;Folr2;Il2ra;Il6;RT1-Bb;Ace;Cxcl10;Dlk1;Fcgr2b;Gpihbp1;Tgfbr3;Kcnma1;Cd200r1;Icos;Cd86;Selp;Ccr5;Kcnj3;Cd83;Plet1;Serpine2;Tnfrsf4;Gp1ba;Fgb;Fgg;Lgals3;Car4;Ptpn7;Gm2a;Kdr;Folr1;Cd8b
GO:0000776	kinetochore	17	76	9.20782e-05	0.0017424	171576;298850;296137;293733;291441;304951;311325;689399;171529;499933;114482;64041;361416;25448;25203;301701;25515	Bub1b;Cenpa;Bub1;Incenp;Ska1;Nuf2;Knstrn;Cenpw;Kif2c;Dsn1;Nek2;Birc5;Cenpn;Cenpi;Ccnb1;Ndc80;Plk1
GO:0000785	chromatin	44	333	0.000130236	0.00237319	684762;293733;64647;84396;680615;680322;117254;304648;684771;684841;316129;100359692;100912290;24571;291157;293502;306970;24890;100910200;502125;298850;100360754;288242;502129;291145;361247;680097;58940;155430;500987;310678;680312;291100;100910554;311723;100360950;366126;291159;294071;306962;691488;100365043;680522;292301	LOC684762;Incenp;Hist1h2bl;Atp1b4;Hist1h2ak;LOC680322;Prdx1;Asf1b;Cdca5;LOC684841;Uhrf1;LOC100359692;LOC100912290;Muc1;Hist1h2bo;Kif22;Hist1h2an;Esr1;LOC100910200;Hist1h2ah;Cenpa;LOC100360754;Chaf1b;Hist1h2ai;Hist1h1a;Hist1h2bd;LOC680097;H2afz;Hey2;H2afx;Hist2h3c2;Hist1h2bk;Irf4;LOC100910554;Sox18;LOC100360950;Spi1;Hist1h2ail;Hells;Hist1h2ac;Hist3h2bb;LOC100365043;Hist1h1b;T
GO:0098687	chromosomal region	24	141	0.000174447	0.00306528	171576;293733;689399;64041;25448;25203;301701;294071;361623;311325;499933;363198;25515;171529;298850;500987;114482;288272;361416;500545;296137;291441;304951;305827	Bub1b;Incenp;Cenpw;Birc5;Cenpi;Ccnb1;Ndc80;Hells;Trim66;Knstrn;Dsn1;Cenpq;Plk1;Kif2c;Cenpa;H2afx;Nek2;Mis18a;Cenpn;Cdca8;Bub1;Ska1;Nuf2;Wdhd1
GO:0000793	condensed chromosome	22	125	0.000210447	0.00357034	171576;293733;689399;64041;684771;25203;301701;311325;499933;298850;171529;360243;500987;502372;114482;25515;361416;296137;291441;304951;497672;499870	Bub1b;Incenp;Cenpw;Birc5;Cdca5;Ccnb1;Ndc80;Knstrn;Dsn1;Cenpa;Kif2c;Top2a;H2afx;Syce1;Nek2;Plk1;Cenpn;Bub1;Ska1;Nuf2;Brca1;Rad51
GO:0031362	anchored component of external side of plasma membrane	6	10	0.000334584	0.00548718	691992;24832;29242;293154;300027;171049	Gp1ba;Thy1;Car4;Folr2;Gpihbp1;Folr1
GO:0000778	condensed nuclear chromosome kinetochore	5	6	0.000377564	0.0059923	25203;171576;298850;301701;25515	Ccnb1;Bub1b;Cenpa;Ndc80;Plk1
GO:0031226	intrinsic component of plasma membrane	60	533	0.000486689	0.0072869	302976;25316;289596;170899;25054;24832;24953;24498;24213;64545;287106;25364;50692;80900;24237;84396;24392;24778;79129;81651;192211;25694;315611;684516;300027;29610;24904;83731;29639;25753;367315;89804;289747;50592;191573;362800;24212;116745;25349;293154;29186;298504;25027;117512;80977;114511;306009;50676;691992;29571;29242;25083;116695;282838;66021;362235;25589;171049;25339;25553	Noxo1;Ms4a2;Corin;Kcnk2;Ntrk2;Thy1;Gcgr;Il6;Atp1a3;Icos;Prss30;Asic2;Plaur;Slco1a5;C6;Atp1b4;Gja1;Slc2a1;Cyba;Cspg4;Prom2;Has2;Scn4b;Kcnc4;Gpihbp1;Tgfbr3;Slc22a1;Kcnma1;Fxyd2;Chrng;Gpr35;Tek;Osm;Gria1;Grin3a;Itgb8;Atp1a2;Kcnh6;Scn2b;Folr2;Cd63;Mfsd2a;Slc16a1;C9;Syt13;Emb;Slc39a14;Slc6a12;Gp1ba;Scn10a;Car4;Adra2a;Kcnd1;Gm2a;Cybb;Syndig1;Kdr;Folr1;Npr3;Slc6a4
GO:0000780	condensed nuclear chromosome, centromeric region	6	11	0.000488755	0.0072869	171576;301701;296137;25203;298850;25515	Bub1b;Ndc80;Bub1;Ccnb1;Cenpa;Plk1
GO:0098590	plasma membrane region	48	407	0.000688347	0.00947131	29597;25330;293650;84403;24832;24212;25544;64041;315215;24891;24571;684984;287610;50719;24392;29440;79129;192211;24778;300027;24904;83731;29290;29639;24310;83567;24451;24777;360034;89804;56765;315190;63843;113959;116649;363060;266714;297932;685232;79242;289229;266807;29242;117264;63997;83509;81651;303886	P2ry2;Lipe;Tcirg1;Gjb6;Thy1;Atp1a2;Sele;Birc5;Mlc1;Abcb4;Muc1;Cd300lg;Lpo;Slc7a5;Gja1;Slc26a4;Cyba;Prom2;Slc2a1;Gpihbp1;Slc22a1;Kcnma1;Adora1;Fxyd2;Ace;Mchr1;Hmox1;Slc10a1;Myrip;Tek;Plvap;Upk3a;P2ry4;C5ar1;Kcnj4;Plet1;Myo7a;Atp6v0d2;Atp6v1a;Hpgd;Vangl2;Duox1;Car4;P2ry6;Slc29a1;Slc7a7;Cspg4;Muc20
GO:0031233	intrinsic component of external side of plasma membrane	6	12	0.000693023	0.00947131	691992;24832;29242;293154;300027;171049	Gp1ba;Thy1;Car4;Folr2;Gpihbp1;Folr1
GO:0031091	platelet alpha granule	6	12	0.000693023	0.00947131	24366;24367;25651;360918;292406;29366	Fgb;Fgg;Selp;Pf4;Thbs2;Serpine2
GO:0000940	condensed chromosome outer kinetochore	5	8	0.000942515	0.0125329	291441;171576;25203;301701;25515	Ska1;Bub1b;Ccnb1;Ndc80;Plk1
GO:0016324	apical plasma membrane	30	223	0.00107873	0.0139667	29597;293650;84403;24832;64041;315215;24891;24571;684984;50719;24392;29440;79129;192211;300027;83731;360034;89804;315190;63843;363060;297932;685232;289229;266807;29242;117264;63997;81651;266714	P2ry2;Tcirg1;Gjb6;Thy1;Birc5;Mlc1;Abcb4;Muc1;Cd300lg;Slc7a5;Gja1;Slc26a4;Cyba;Prom2;Gpihbp1;Kcnma1;Myrip;Tek;Upk3a;P2ry4;Plet1;Atp6v0d2;Atp6v1a;Vangl2;Duox1;Car4;P2ry6;Slc29a1;Cspg4;Myo7a
GO:0005583	fibrillar collagen trimer	5	10	0.00197152	0.0248715	25654;84032;60379;81682;29393	Col11a1;Col3a1;Col5a3;Lum;Col1a1
GO:0005819	spindle	26	193	0.00218119	0.0268286	304477;293733;313840;54237;114482;64041;308761;25203;360161;293502;171304;315298;311325;289997;296846;25415;64515;311546;361308;289054;25515;360621;500545;311336;294286;291441	Kntc1;Incenp;Rmdn2;Cdk1;Nek2;Birc5;Prc1;Ccnb1;Nek6;Kif22;Kif11;Racgap1;Knstrn;Dlgap5;Hepacam2;Crmp1;Cdc20;Tpx2;Kif20a;Aspm;Plk1;Cdc6;Cdca8;Nusap1;Kifc1;Ska1
GO:0045177	apical part of cell	36	300	0.00227302	0.0272763	29597;293650;84403;24832;64041;170913;315215;24891;24571;684984;50719;24392;29440;79129;192211;300027;63865;83731;360034;89804;315190;63843;113959;363060;500464;297932;685232;289229;266807;29242;117264;63997;81651;65034;282838;266714	P2ry2;Tcirg1;Gjb6;Thy1;Birc5;Abcb1a;Mlc1;Abcb4;Muc1;Cd300lg;Slc7a5;Gja1;Slc26a4;Cyba;Prom2;Gpihbp1;Lgmn;Kcnma1;Myrip;Tek;Upk3a;P2ry4;C5ar1;Plet1;Epb41l4b;Atp6v0d2;Atp6v1a;Vangl2;Duox1;Car4;P2ry6;Slc29a1;Cspg4;Pdzd2;Gm2a;Myo7a
GO:0000794	condensed nuclear chromosome	12	61	0.00245012	0.0287014	171576;298850;500987;296137;293733;114482;502372;25203;301701;497672;499870;25515	Bub1b;Cenpa;H2afx;Bub1;Incenp;Nek2;Syce1;Ccnb1;Ndc80;Brca1;Rad51;Plk1
GO:0090533	cation-transporting ATPase complex	5	11	0.00271558	0.0309567	24212;24213;29639;282838;84396	Atp1a2;Atp1a3;Fxyd2;Gm2a;Atp1b4
GO:0005887	integral component of plasma membrane	52	485	0.00276848	0.0309567	302976;289596;170899;25054;24953;24498;24213;64545;25364;50692;80900;24237;24392;24778;79129;81651;192211;25694;315611;684516;29610;24904;83731;29639;25753;367315;89804;362800;50592;191573;289747;24212;116745;25349;25316;84396;298504;25027;117512;80977;114511;306009;50676;29571;25083;116695;282838;66021;362235;25589;25339;25553	Noxo1;Corin;Kcnk2;Ntrk2;Gcgr;Il6;Atp1a3;Icos;Asic2;Plaur;Slco1a5;C6;Gja1;Slc2a1;Cyba;Cspg4;Prom2;Has2;Scn4b;Kcnc4;Tgfbr3;Slc22a1;Kcnma1;Fxyd2;Chrng;Gpr35;Tek;Itgb8;Gria1;Grin3a;Osm;Atp1a2;Kcnh6;Scn2b;Ms4a2;Atp1b4;Mfsd2a;Slc16a1;C9;Syt13;Emb;Slc39a14;Slc6a12;Scn10a;Adra2a;Kcnd1;Gm2a;Cybb;Syndig1;Kdr;Npr3;Slc6a4
GO:0000922	spindle pole	13	75	0.00433027	0.0473443	360621;304477;171304;311546;313840;64515;311325;114482;25203;289054;289997;360161;25515	Cdc6;Kntc1;Kif11;Tpx2;Rmdn2;Cdc20;Knstrn;Nek2;Ccnb1;Aspm;Dlgap5;Nek6;Plk1
GO:0048770	pigment granule	13	78	0.00577838	0.0604886	365042;360034;50671;29465;24778;117254;117596;297339;29186;266714;25017;81707;501162	Rab32;Myrip;Fasn;Trpv2;Slc2a1;Prdx1;Atp6v1b2;Capg;Cd63;Myo7a;Myo5a;Mmp14;Mreg
GO:0042470	melanosome	13	78	0.00577838	0.0604886	365042;360034;50671;29465;24778;117254;117596;297339;29186;266714;25017;81707;501162	Rab32;Myrip;Fasn;Trpv2;Slc2a1;Prdx1;Atp6v1b2;Capg;Cd63;Myo7a;Myo5a;Mmp14;Mreg
GO:0016323	basolateral plasma membrane	22	168	0.00609085	0.0616778	29597;684984;315215;24310;287610;83509;192211;24778;300027;24904;29290;29639;24777;89804;63997;63843;113959;116649;79242;289229;117264;303886	P2ry2;Cd300lg;Mlc1;Ace;Lpo;Slc7a7;Prom2;Slc2a1;Gpihbp1;Slc22a1;Adora1;Fxyd2;Slc10a1;Tek;Slc29a1;P2ry4;C5ar1;Kcnj4;Hpgd;Vangl2;P2ry6;Muc20
GO:0098533	ATPase dependent transmembrane transport complex	5	14	0.00614271	0.0616778	24212;24213;29639;282838;84396	Atp1a2;Atp1a3;Fxyd2;Gm2a;Atp1b4
GO:0046658	anchored component of plasma membrane	7	28	0.00641884	0.0631614	691992;24832;29242;293154;300027;287106;171049	Gp1ba;Thy1;Car4;Folr2;Gpihbp1;Prss30;Folr1
GO:0000228	nuclear chromosome	34	303	0.00738091	0.0712041	171576;316129;289777;293733;114482;117254;304648;64041;497672;25203;301701;680097;100912290;24571;680522;298850;288242;291145;684771;360243;58940;155430;500987;291100;311723;100360950;25515;502372;366126;291159;296137;292301;499870;313108	Bub1b;Uhrf1;Fignl1;Incenp;Nek2;Prdx1;Asf1b;Birc5;Brca1;Ccnb1;Ndc80;LOC680097;LOC100912290;Muc1;Hist1h1b;Cenpa;Chaf1b;Hist1h1a;Cdca5;Top2a;H2afz;Hey2;H2afx;Irf4;Sox18;LOC100360950;Plk1;Syce1;Spi1;Hist1h2ail;Bub1;T;Rad51;Mms22l
GO:0005890	sodium:potassium-exchanging ATPase complex	4	9	0.00782394	0.0740265	24212;24213;29639;84396	Atp1a2;Atp1a3;Fxyd2;Atp1b4
GO:0031225	anchored component of membrane	12	74	0.00940072	0.0872671	691992;171049;29242;24832;363060;50692;300027;246138;287106;293154;60350;117258	Gp1ba;Folr1;Car4;Thy1;Plet1;Plaur;Gpihbp1;Ly6i;Prss30;Folr2;Cd14;Cntn1
GO:0005876	spindle microtubule	7	35	0.0173702	0.158262	304477;171304;291441;54237;311336;64041;25515	Kntc1;Kif11;Ska1;Cdk1;Nusap1;Birc5;Plk1
GO:0005874	microtubule	27	245	0.018743	0.167664	500377;291081;25728;313840;54237;29213;25017;304477;293502;171304;246118;311325;298692;311336;171529;311546;361308;289054;100909441;25515;300218;307351;294286;291441;64041;306575;81779	Tuba8;Tubb2b;Apoe;Rmdn2;Cdk1;Tubb4a;Myo5a;Kntc1;Kif22;Kif11;Tubb3;Knstrn;Ttll10;Nusap1;Kif2c;Tpx2;Kif20a;Aspm;LOC100909441;Plk1;Tuba1c;Tubb6;Kifc1;Ska1;Birc5;Ckap2;Sctr
GO:0005771	multivesicular body	6	28	0.0206456	0.181387	25350;24392;170824;29186;24773;688090	Sftpd;Gja1;Steap3;Cd63;Sftpa1;RT1-Bb
GO:0005764	lysosome	34	331	0.0221536	0.187924	29597;317676;25524;293650;303801;59267;290644;315215;25017;83799;361689;24392;24375;25686;25728;117596;63865;497009;29175;25425;24434;501854;294269;65161;25732;81511;29186;685232;297694;367166;282838;266714;50654;292306	P2ry2;Lat2;Psap;Tcirg1;Lamp3;Syt7;Ifi30;Mlc1;Myo5a;Dpp7;Unc93b1;Gja1;Fuca1;Gnai1;Apoe;Atp6v1b2;Lgmn;Naaa;Ctsk;Ctsh;Gusb;Rab7b;RT1-Da;Litaf;Acp5;Lat;Cd63;Atp6v1a;Plbd1;Hyal1;Gm2a;Myo7a;Ctss;Rnaset2
GO:0000323	lytic vacuole	34	331	0.0221536	0.187924	29597;317676;25524;293650;303801;59267;290644;315215;25017;83799;361689;24392;24375;25686;25728;117596;63865;497009;29175;25425;24434;501854;294269;65161;25732;81511;29186;685232;297694;367166;282838;266714;50654;292306	P2ry2;Lat2;Psap;Tcirg1;Lamp3;Syt7;Ifi30;Mlc1;Myo5a;Dpp7;Unc93b1;Gja1;Fuca1;Gnai1;Apoe;Atp6v1b2;Lgmn;Naaa;Ctsk;Ctsh;Gusb;Rab7b;RT1-Da;Litaf;Acp5;Lat;Cd63;Atp6v1a;Plbd1;Hyal1;Gm2a;Myo7a;Ctss;Rnaset2
GO:0044420	extracellular matrix part	12	86	0.0246137	0.201832	116640;298185;116510;25654;84032;287526;292406;60379;85266;363265;81682;29393	Tnc;Frem1;Timp1;Col11a1;Col3a1;Serpinf1;Thbs2;Col5a3;Prss12;Col4a3;Lum;Col1a1
GO:0030496	midbody	12	86	0.0246137	0.201832	294074;500545;293733;315298;54237;24778;64041;114482;289054;25686;296846;25515	Cep55;Cdca8;Incenp;Racgap1;Cdk1;Slc2a1;Birc5;Nek2;Aspm;Gnai1;Hepacam2;Plk1
GO:0098589	membrane region	92	1064	0.0259481	0.209286	29597;317676;293650;29599;315215;684984;50719;24392;286896;300027;83731;29290;84493;498840;360034;89804;24904;60350;266684;311374;79217;50672;289229;50568;117264;288026;25589;266758;170899;24832;64041;83792;246074;25686;24571;29230;361527;29440;79129;24891;24778;81743;29639;24310;24777;50592;56765;63997;63843;64191;24886;113976;246245;116831;25330;24950;24212;25544;25427;287633;192211;24299;83567…	P2ry2;Lat2;Tcirg1;Atp2b3;Mlc1;Cd300lg;Slc7a5;Gja1;Sgpl1;Gpihbp1;Kcnma1;Adora1;Fmo3;Tmem173;Myrip;Tek;Slc22a1;Cd14;Cyp2d1;Duoxa1;Gja3;Ednrb;Vangl2;Cspg5;P2ry6;Atp13a4;Kdr;Sec11c;Kcnk2;Thy1;Birc5;Scd;Scd1;Gnai1;Muc1;Sqle;Pld3;Slc26a4;Cyba;Abcb4;Slc2a1;Pde2a;Fxyd2;Ace;Slc10a1;Gria1;Plvap;Slc29a1;P2ry4;Dhcr7;Tbxas1;Acsl4;Fmo2;Fxyd3;Lipe;Srd5a1;Atp1a2;Sele;Cyp51;Lrrc59;Prom2;Cyp2a3;Mchr1;Hmox1;Upk3a;C…
GO:0005773	vacuole	37	374	0.0280609	0.222677	29597;317676;25524;293650;303801;59267;290644;192129;315215;25017;83799;361689;24392;24375;25686;25728;117596;63865;497009;29175;25425;24434;501854;294269;65161;25732;81511;297932;29186;685232;83620;297694;367166;282838;266714;50654;292306	P2ry2;Lat2;Psap;Tcirg1;Lamp3;Syt7;Ifi30;Vmp1;Mlc1;Myo5a;Dpp7;Unc93b1;Gja1;Fuca1;Gnai1;Apoe;Atp6v1b2;Lgmn;Naaa;Ctsk;Ctsh;Gusb;Rab7b;RT1-Da;Litaf;Acp5;Lat;Atp6v0d2;Cd63;Atp6v1a;Cit;Plbd1;Hyal1;Gm2a;Myo7a;Ctss;Rnaset2
GO:0042555	MCM complex	3	8	0.0302312	0.232403	29728;313108;291885	Mcm4;Mms22l;Mcm5
GO:0043020	NADPH oxidase complex	3	8	0.0302312	0.232403	302976;79129;66021	Noxo1;Cyba;Cybb
GO:0031410	cytoplasmic vesicle	68	783	0.045381	0.343499	498638;360034;25350;361689;170897;303801;29366;60566;292848;117254;117596;297339;315215;25569;311327;25017;83799;364018;501162;54242;24392;29465;289596;192211;29692;24476;292406;65046;170568;81820;85266;24770;113898;25425;81707;29393;365042;501854;365377;50592;291597;117558;25651;116649;25046;25589;245977;29186;192249;80977;26989;59267;24171;117038;289229;50671;50568;24366;24367;29244;29242;36091…	Msr1;Myrip;Sftpd;Unc93b1;Sphk1;Lamp3;Serpine2;Syt8;Klk13;Prdx1;Atp6v1b2;Capg;Mlc1;Trh;Casc5;Myo5a;Dpp7;Ncf2;Mreg;Cpa3;Gja1;Trpv2;Corin;Prom2;Pla2g2a;Iapp;Thbs2;Ap2s1;Dmbt1;Doc2b;Prss12;Ccl2;Prdx5;Ctsh;Mmp14;Col1a1;Rab32;Rab7b;Trim72;Gria1;Trim36;Mylk2;Selp;Kcnj4;Pigr;Kdr;Gpr116;Cd63;Ehd3;Syt13;Cadps;Syt7;Add2;Mt3;Vangl2;Fasn;Cspg5;Fgb;Fgg;Gch1;Car4;Pf4;Hyal1;Scamp5;Sftpa1;Myo7a;Snap91;Slc2a1
GO:0010369	chromocenter	3	10	0.0475808	0.354693	361623;500545;293733	Trim66;Cdca8;Incenp
GO:0005922	connexon complex	4	18	0.0503738	0.369909	29584;79217;24392;84403	Gjb1;Gja3;Gja1;Gjb6
GO:0035371	microtubule plus-end	3	11	0.0577215	0.417632	171529;25017;311325	Kif2c;Myo5a;Knstrn
GO:0000801	central element	2	5	0.0708001	0.497623	293733;502372	Incenp;Syce1
GO:0031232	extrinsic component of external side of plasma membrane	2	5	0.0708001	0.497623	25728;29366	Apoe;Serpine2
GO:0001518	voltage-gated sodium channel complex	3	13	0.0807265	0.559401	29571;25349;315611	Scn10a;Scn2b;Scn4b
GO:0001772	immunological synapse	4	22	0.0841196	0.570488	83781;691993;81511;24251	Lgals3;Scimp;Lat;Cd53
GO:0044454	nuclear chromosome part	25	263	0.0847574	0.570488	171576;301701;293733;117254;304648;25203;316129;24571;680522;298850;288242;291145;684771;58940;155430;500987;291100;311723;25515;502372;366126;296137;292301;499870;313108	Bub1b;Ndc80;Incenp;Prdx1;Asf1b;Ccnb1;Uhrf1;Muc1;Hist1h1b;Cenpa;Chaf1b;Hist1h1a;Cdca5;H2afz;Hey2;H2afx;Irf4;Sox18;Plk1;Syce1;Spi1;Bub1;T;Rad51;Mms22l
GO:0043203	axon hillock	2	6	0.0904418	0.570488	311546;287526	Tpx2;Serpinf1
GO:0032433	filopodium tip	2	6	0.0904418	0.570488	316521;25017	Vil1;Myo5a
GO:0001939	female pronucleus	2	6	0.0904418	0.570488	24778;114494	Slc2a1;Ccna2
GO:0046696	lipopolysaccharide receptor complex	2	6	0.0904418	0.570488	60350;448830	Cd14;Ly96
GO:0031907	microbody lumen	3	14	0.093489	0.570488	117254;81726;113898	Prdx1;Mvd;Prdx5
GO:0005782	peroxisomal matrix	3	14	0.093489	0.570488	117254;81726;113898	Prdx1;Mvd;Prdx5
GO:0000791	euchromatin	4	23	0.0939218	0.570488	117254;291145;58940;316129	Prdx1;Hist1h1a;H2afz;Uhrf1
GO:0033176	proton-transporting V-type ATPase complex	4	23	0.0939218	0.570488	117596;685232;293650;297932	Atp6v1b2;Atp6v1a;Tcirg1;Atp6v0d2
GO:0005901	caveola	8	65	0.0993458	0.588893	25330;56765;24778;24212;25544;83731;315215;24451	Lipe;Plvap;Slc2a1;Atp1a2;Sele;Kcnma1;Mlc1;Hmox1
GO:0044853	plasma membrane raft	8	65	0.0993458	0.588893	25330;56765;24778;24212;25544;83731;315215;24451	Lipe;Plvap;Slc2a1;Atp1a2;Sele;Kcnma1;Mlc1;Hmox1
GO:0019897	extrinsic component of plasma membrane	10	89	0.107839	0.631628	89788;363091;25728;315298;81639;24333;54296;29366;25686;365901	Gna15;Myzap;Apoe;Racgap1;Alox15;Eno1;Rgs7;Serpine2;Gnai1;Gnat2
GO:0070531	BRCA1-A complex	2	7	0.111436	0.64112	64557;497672	Bard1;Brca1
GO:0031234	extrinsic component of cytoplasmic side of plasma membrane	7	56	0.112066	0.64112	89788;363091;315298;81639;54296;25686;365901	Gna15;Myzap;Racgap1;Alox15;Rgs7;Gnai1;Gnat2
GO:0060076	excitatory synapse	4	25	0.115038	0.650561	362235;25054;50592;288512	Syndig1;Ntrk2;Gria1;Elfn1
GO:0034706	sodium channel complex	3	16	0.12125	0.677895	29571;25349;315611	Scn10a;Scn2b;Scn4b
GO:0005884	actin filament	7	58	0.126577	0.697319	114203;89804;306071;362107;29427;29437;25017	Sh2b2;Tek;Lcp1;Aif1l;Aif1;Acta1;Myo5a
GO:0030141	secretory granule	22	240	0.129049	0.697319	170568;303801;60566;292848;59267;25569;29692;25017;364018;291597;311327;24476;292406;25425;29393;360034;25651;29366;24366;24367;29242;360918	Dmbt1;Lamp3;Syt8;Klk13;Syt7;Trh;Pla2g2a;Myo5a;Ncf2;Trim36;Casc5;Iapp;Thbs2;Ctsh;Col1a1;Myrip;Selp;Serpine2;Fgb;Fgg;Car4;Pf4
GO:0005769	early endosome	15	153	0.129854	0.697319	365042;29597;50592;24392;362235;361244;25728;297932;294286;25589;288504;315215;688090;25017;286894	Rab32;P2ry2;Gria1;Gja1;Syndig1;RGD1307443;Apoe;Atp6v0d2;Kifc1;Kdr;Snx8;Mlc1;RT1-Bb;Myo5a;Parm1
GO:0016023	cytoplasmic membrane-bounded vesicle	58	711	0.130393	0.697319	360034;361689;170897;303801;29366;60566;292848;117254;117596;297339;25569;311327;25017;83799;364018;501162;54242;24392;29465;289596;29692;24476;292406;65046;170568;81820;24770;25425;81707;29393;365042;501854;365377;50592;291597;117558;25651;116649;25046;25589;29186;192249;80977;26989;59267;24171;117038;289229;50671;50568;24366;24367;29242;360918;65171;266714;65178;24778	Myrip;Unc93b1;Sphk1;Lamp3;Serpine2;Syt8;Klk13;Prdx1;Atp6v1b2;Capg;Trh;Casc5;Myo5a;Dpp7;Ncf2;Mreg;Cpa3;Gja1;Trpv2;Corin;Pla2g2a;Iapp;Thbs2;Ap2s1;Dmbt1;Doc2b;Ccl2;Ctsh;Mmp14;Col1a1;Rab32;Rab7b;Trim72;Gria1;Trim36;Mylk2;Selp;Kcnj4;Pigr;Kdr;Cd63;Ehd3;Syt13;Cadps;Syt7;Add2;Mt3;Vangl2;Fasn;Cspg5;Fgb;Fgg;Car4;Pf4;Scamp5;Myo7a;Snap91;Slc2a1
GO:0045121	membrane raft	22	241	0.132674	0.697651	25330;24832;317676;25316;29599;24212;25544;315215;25686;24392;192211;24778;81743;83731;79217;24451;89804;56765;25553;60350;50672;25589	Lipe;Thy1;Lat2;Ms4a2;Atp2b3;Atp1a2;Sele;Mlc1;Gnai1;Gja1;Prom2;Slc2a1;Pde2a;Kcnma1;Gja3;Hmox1;Tek;Plvap;Slc6a4;Cd14;Ednrb;Kdr
GO:0046581	intercellular canaliculus	2	8	0.133525	0.697651	24891;170913	Abcb4;Abcb1a
GO:0005881	cytoplasmic microtubule	6	48	0.13518	0.697651	171529;300218;306575;64041;81779;100909441	Kif2c;Tuba1c;Ckap2;Birc5;Sctr;LOC100909441
GO:0005719	nuclear euchromatin	3	17	0.136127	0.697651	117254;291145;58940	Prdx1;Hist1h1a;H2afz
GO:0005921	gap junction	4	27	0.138018	0.700052	29584;79217;24392;84403	Gjb1;Gja3;Gja1;Gjb6
GO:0005777	peroxisome	12	119	0.142625	0.70122	81726;171142;296138;24599;89784;117254;83791;498840;113898;24479;25017;113976	Mvd;Lbp;Acoxl;Nos2;Idi1;Prdx1;Fdps;Tmem173;Prdx5;Idh1;Myo5a;Acsl4
GO:0042579	microbody	12	119	0.142625	0.70122	81726;171142;296138;24599;89784;117254;83791;498840;113898;24479;25017;113976	Mvd;Lbp;Acoxl;Nos2;Idi1;Prdx1;Fdps;Tmem173;Prdx5;Idh1;Myo5a;Acsl4
GO:0005871	kinesin complex	5	38	0.143458	0.70122	294286;171529;293502;171304;361308	Kifc1;Kif2c;Kif22;Kif11;Kif20a
GO:0031526	brush border membrane	6	49	0.14395	0.70122	298340;29440;171049;29242;80900;24310	Slc6a14;Slc26a4;Folr1;Car4;Slco1a5;Ace
GO:0051233	spindle midzone	3	18	0.151587	0.723674	360621;315298;25515	Cdc6;Racgap1;Plk1
GO:0048786	presynaptic active zone	3	18	0.151587	0.723674	29290;25054;83731	Adora1;Ntrk2;Kcnma1
GO:0032432	actin filament bundle	6	50	0.152972	0.723674	114203;89804;289229;306071;29437;316521	Sh2b2;Tek;Vangl2;Lcp1;Acta1;Vil1
GO:0097208	alveolar lamellar body	2	9	0.156479	0.7263	25425;303801	Ctsh;Lamp3
GO:0033180	proton-transporting V-type ATPase, V1 domain	2	9	0.156479	0.7263	117596;685232	Atp6v1b2;Atp6v1a
GO:0005768	endosome	38	458	0.162535	0.740998	29597;25350;297738;25316;25054;24953;24212;315215;688090;25017;361689;24310;306283;24392;79129;25728;63865;288504;24773;317170;365042;501854;84510;50592;294269;25046;170824;117029;297932;29186;192249;286894;361244;362235;65171;294286;25589;25553	P2ry2;Sftpd;Steap1;Ms4a2;Ntrk2;Gcgr;Atp1a2;Mlc1;RT1-Bb;Myo5a;Unc93b1;Ace;Anxa8;Gja1;Cyba;Apoe;Lgmn;Snx8;Sftpa1;Slc9a7;Rab32;Rab7b;Stmn2;Gria1;RT1-Da;Pigr;Steap3;Ccr5;Atp6v0d2;Cd63;Ehd3;Parm1;RGD1307443;Syndig1;Scamp5;Kifc1;Kdr;Slc6a4
GO:0072686	mitotic spindle	4	29	0.162658	0.740998	289054;315298;54237;311325	Aspm;Racgap1;Cdk1;Knstrn
GO:0043025	neuronal cell body	35	419	0.164629	0.743095	25728;25154;25054;24950;29213;25364;24890;29427;259243;246118;25017;79129;24770;24476;309650;83731;29290;25415;84510;50592;191573;311546;117558;116649;25557;497979;29366;29221;24482;113976;83620;287526;116695;66021;25589	Apoe;Pgr;Ntrk2;Srd5a1;Tubb4a;Asic2;Esr1;Aif1;Kcnip4;Tubb3;Myo5a;Cyba;Ccl2;Iapp;Cpne5;Kcnma1;Adora1;Crmp1;Stmn2;Gria1;Grin3a;Tpx2;Mylk2;Kcnj4;Star;Tmem100;Serpine2;Arg1;Igf1;Acsl4;Cit;Serpinf1;Kcnd1;Cybb;Kdr
GO:0005791	rough endoplasmic reticulum	7	64	0.175297	0.774469	25350;25054;29242;66021;24770;24773;310392	Sftpd;Ntrk2;Car4;Cybb;Ccl2;Sftpa1;Slc7a11
GO:0005721	pericentric heterochromatin	2	10	0.180094	0.774469	293733;294071	Incenp;Hells
GO:0033179	proton-transporting V-type ATPase, V0 domain	2	10	0.180094	0.774469	293650;297932	Tcirg1;Atp6v0d2
GO:0000800	lateral element	2	10	0.180094	0.774469	293733;499870	Incenp;Rad51
GO:0031045	dense core granule	2	10	0.180094	0.774469	59267;360034	Syt7;Myrip
GO:0005770	late endosome	13	138	0.181024	0.774469	306283;501854;25350;24392;294269;170824;25728;63865;29186;24773;688090;25017;286894	Anxa8;Rab7b;Sftpd;Gja1;RT1-Da;Steap3;Apoe;Lgmn;Cd63;Sftpa1;RT1-Bb;Myo5a;Parm1
GO:0042641	actomyosin	6	55	0.201526	0.823443	306071;89804;289229;114203;29437;25017	Lcp1;Tek;Vangl2;Sh2b2;Acta1;Myo5a
GO:0001750	photoreceptor outer segment	4	32	0.202246	0.823443	266714;360034;25017;365901	Myo7a;Myrip;Myo5a;Gnat2
GO:0005834	heterotrimeric G-protein complex	4	32	0.202246	0.823443	89788;54296;25686;365901	Gna15;Rgs7;Gnai1;Gnat2
GO:0033267	axon part	15	167	0.202313	0.823443	117558;50592;25154;29465;311546;25054;287526;24770;684516;29213;65199;83731;85266;29290;24890	Mylk2;Gria1;Pgr;Trpv2;Tpx2;Ntrk2;Serpinf1;Ccl2;Kcnc4;Tubb4a;Kcnip3;Kcnma1;Prss12;Adora1;Esr1
GO:0043679	axon terminus	10	104	0.204063	0.823443	117558;25154;25054;24770;684516;65199;83731;85266;29290;24890	Mylk2;Pgr;Ntrk2;Ccl2;Kcnc4;Kcnip3;Kcnma1;Prss12;Adora1;Esr1
GO:0044297	cell body	38	471	0.204128	0.823443	25728;25154;25054;24950;29213;25364;24890;29427;259243;29465;246118;25017;79129;24770;24476;309650;83731;29290;25415;84510;50592;191573;311546;117558;24807;116649;25557;497979;29366;29221;24482;113976;83620;362235;287526;116695;66021;25589	Apoe;Pgr;Ntrk2;Srd5a1;Tubb4a;Asic2;Esr1;Aif1;Kcnip4;Trpv2;Tubb3;Myo5a;Cyba;Ccl2;Iapp;Cpne5;Kcnma1;Adora1;Crmp1;Stmn2;Gria1;Grin3a;Tpx2;Mylk2;Tacr1;Kcnj4;Star;Tmem100;Serpine2;Arg1;Igf1;Acsl4;Cit;Syndig1;Serpinf1;Kcnd1;Cybb;Kdr
GO:0031430	M band	2	11	0.204187	0.823443	311167;140939	Smtnl1;Trim63
GO:0005783	endoplasmic reticulum	78	1017	0.207125	0.828498	266758;287450;25350;287633;25154;170899;29242;25054;24832;171394;298068;24213;65199;83792;246074;192129;680945;25375;25017;25427;361689;291675;114097;361527;29230;24392;50568;24464;79129;29692;25728;81869;24299;54246;29610;81743;83731;29290;24773;311374;24451;29393;29584;50592;66021;25629;89824;170635;292306;24950;25256;497979;64191;24886;24770;140910;310392;84493;266684;113976;306009;252929;3152…	Sec11c;Slc16a11;Sftpd;Lrrc59;Pgr;Kcnk2;Car4;Ntrk2;Thy1;Clstn2;Sec61b;Atp1a3;Kcnip3;Scd;Scd1;Vmp1;Sdf2l1;Aldh3a1;Myo5a;Cyp51;Unc93b1;Mzb1;Ltc4s;Pld3;Sqle;Gja1;Cspg5;Hp;Cyba;Pla2g2a;Apoe;Gstm7;Cyp2a3;Cyp2f4;Tgfbr3;Pde2a;Kcnma1;Adora1;Sftpa1;Duoxa1;Hmox1;Col1a1;Gjb1;Gria1;Cybb;Plin1;Chi3l1;Dhrs9;Rnaset2;Srd5a1;Fmo1;Tmem100;Dhcr7;Tbxas1;Ccl2;Msmo1;Slc7a11;Fmo3;Cyp2d1;Acsl4;Slc39a14;Ctsz;Mlc1;Fmo2;Bca…
GO:0005811	lipid particle	5	44	0.209527	0.83135	81639;25629;25330;24383;113976	Alox15;Plin1;Lipe;Gapdh;Acsl4
GO:0000145	exocyst	2	12	0.228598	0.877419	360034;299339	Myrip;Tnfaip2
GO:0005614	interstitial matrix	2	12	0.228598	0.877419	116640;24482	Tnc;Igf1
GO:0042613	MHC class II protein complex	2	12	0.228598	0.877419	294269;688090	RT1-Da;RT1-Bb
GO:0000152	nuclear ubiquitin ligase complex	4	34	0.230055	0.877419	64557;497672;64515;296368	Bard1;Brca1;Cdc20;Ube2c
GO:0055038	recycling endosome membrane	4	34	0.230055	0.877419	317170;65171;25046;192249	Slc9a7;Scamp5;Pigr;Ehd3
GO:0048471	perinuclear region of cytoplasm	37	467	0.237894	0.900339	300795;171576;406864;287526;64515;24950;58812;117038;25544;296654;315215;24890;59103;79129;29692;81743;83731;29427;113898;24599;24451;289993;498840;360034;89804;84510;56765;89824;191575;497979;24770;310395;192249;29242;689415;499870;54410	Ns5atp9;Bub1b;Clic1;Serpinf1;Cdc20;Srd5a1;Apln;Mt3;Sele;Gsn;Mlc1;Esr1;Ptges;Cyba;Pla2g2a;Pde2a;Kcnma1;Aif1;Prdx5;Nos2;Hmox1;Cdkn3;Tmem173;Myrip;Tek;Stmn2;Plvap;Chi3l1;Nme1;Tmem100;Ccl2;Ccr4;Ehd3;Car4;Mt2A;Rad51;Enpp3
GO:0043195	terminal bouton	6	59	0.24385	0.915835	25054;117558;83731;85266;29290;24890	Ntrk2;Mylk2;Kcnma1;Prss12;Adora1;Esr1
GO:0000790	nuclear chromatin	15	175	0.250565	0.929603	291145;684771;58940;366126;500987;680522;291100;117254;304648;316129;311723;155430;292301;288242;24571	Hist1h1a;Cdca5;H2afz;Spi1;H2afx;Hist1h1b;Irf4;Prdx1;Asf1b;Uhrf1;Sox18;Hey2;T;Chaf1b;Muc1
GO:0019898	extrinsic component of membrane	12	136	0.251727	0.929603	89788;363091;25728;170568;315298;500464;81639;24333;54296;29366;25686;365901	Gna15;Myzap;Apoe;Dmbt1;Racgap1;Epb41l4b;Alox15;Eno1;Rgs7;Serpine2;Gnai1;Gnat2
GO:0032279	asymmetric synapse	2	13	0.253185	0.929603	29290;50592	Adora1;Gria1
GO:0001725	stress fiber	5	48	0.258075	0.93599	306071;89804;29437;289229;114203	Lcp1;Tek;Acta1;Vangl2;Sh2b2
GO:0045178	basal part of cell	4	36	0.258729	0.93599	303886;89804;293118;24310	Muc20;Tek;Prcp;Ace
GO:0005604	basement membrane	6	61	0.265917	0.954972	116640;298185;287526;116510;292406;363265	Tnc;Frem1;Serpinf1;Timp1;Thbs2;Col4a3
GO:0000795	synaptonemal complex	3	25	0.271071	0.955861	293733;502372;499870	Incenp;Syce1;Rad51
GO:0001726	ruffle	9	100	0.27425	0.955861	83620;114203;306071;191575;117596;296654;29427;316521;25017	Cit;Sh2b2;Lcp1;Nme1;Atp6v1b2;Gsn;Aif1;Vil1;Myo5a
GO:0044306	neuron projection terminus	10	113	0.274599	0.955861	117558;25154;25054;24770;684516;65199;83731;85266;29290;24890	Mylk2;Pgr;Ntrk2;Ccl2;Kcnc4;Kcnip3;Kcnma1;Prss12;Adora1;Esr1
GO:0042599	lamellar body	2	14	0.277821	0.955861	25425;303801	Ctsh;Lamp3
GO:0016471	vacuolar proton-transporting V-type ATPase complex	2	14	0.277821	0.955861	293650;297932	Tcirg1;Atp6v0d2
GO:0045120	pronucleus	2	14	0.277821	0.955861	24778;114494	Slc2a1;Ccna2
GO:0009925	basal plasma membrane	3	26	0.289075	0.987672	303886;89804;24310	Muc20;Tek;Ace
GO:0015630	microtubule cytoskeleton	53	703	0.294695	0.999929	500377;291441;304477;500545;293733;313840;64515;114482;311325;29213;308761;25203;680280;25027;360161;25017;25728;293502;171304;246118;25686;315298;310344;64041;298692;289997;296846;311336;294074;25415;171529;360243;54237;311546;362415;191575;361308;298884;289054;100909441;25515;24383;360621;308064;300218;307351;294286;291081;117524;306575;309523;81779;315330	Tuba8;Ska1;Kntc1;Cdca8;Incenp;Rmdn2;Cdc20;Nek2;Knstrn;Tubb4a;Prc1;Ccnb1;Gas2l3;Slc16a1;Nek6;Myo5a;Apoe;Kif22;Kif11;Tubb3;Gnai1;Racgap1;Plk4;Birc5;Ttll10;Dlgap5;Hepacam2;Nusap1;Cep55;Crmp1;Kif2c;Top2a;Cdk1;Tpx2;Ttll3;Nme1;Kif20a;Gen1;Aspm;LOC100909441;Plk1;Gapdh;Cdc6;Cep72;Tuba1c;Tubb6;Kifc1;Tubb2b;Ccnf;Ckap2;Kif20b;Sctr;Espl1
GO:0005903	brush border	6	64	0.299875	1	298340;29440;171049;29242;80900;24310	Slc6a14;Slc26a4;Folr1;Car4;Slco1a5;Ace
GO:0001673	male germ cell nucleus	2	15	0.302399	1	500987;292206	H2afx;Trip13
GO:1902495	transmembrane transporter complex	18	224	0.306058	1	24212;25753;50592;315611;406864;24213;170899;29571;84396;25349;29695;684516;191573;116695;282838;83731;29639;81658	Atp1a2;Chrng;Gria1;Scn4b;Clic1;Atp1a3;Kcnk2;Scn10a;Atp1b4;Scn2b;Gabrr2;Kcnc4;Grin3a;Kcnd1;Gm2a;Kcnma1;Fxyd2;Gabrp
GO:0044430	cytoskeletal part	76	1032	0.318372	1	500377;114203;363091;291441;304477;500545;293733;25054;64515;25415;114482;311325;117524;308761;25203;64041;25027;50592;294043;360161;315318;25728;308709;293502;24392;171304;246118;25017;315298;310344;24778;298692;54227;25686;29290;289997;296846;311336;81779;294074;89804;315330;360243;306071;191573;54237;311546;117558;362107;191575;313840;361308;298884;29427;289054;100909441;289229;29437;25515;241…	Tuba8;Sh2b2;Myzap;Ska1;Kntc1;Cdca8;Incenp;Ntrk2;Cdc20;Crmp1;Nek2;Knstrn;Ccnf;Prc1;Ccnb1;Birc5;Slc16a1;Gria1;Sorcs3;Nek6;Krt80;Apoe;Synm;Kif22;Gja1;Kif11;Tubb3;Myo5a;Racgap1;Plk4;Slc2a1;Ttll10;Arpc1b;Gnai1;Adora1;Dlgap5;Hepacam2;Nusap1;Sctr;Cep55;Tek;Espl1;Top2a;Lcp1;Grin3a;Cdk1;Tpx2;Mylk2;Aif1l;Nme1;Rmdn2;Kif20a;Gen1;Aif1;Aspm;LOC100909441;Vangl2;Acta1;Plk1;Add2;Cdc6;Cep72;Tuba1c;Tubb6;Syndig1;Tu…
GO:0030667	secretory granule membrane	5	53	0.321867	1	360034;29242;170568;25651;303801	Myrip;Car4;Dmbt1;Selp;Lamp3
GO:1990351	transporter complex	18	227	0.32445	1	24212;25753;50592;315611;406864;24213;170899;29571;84396;25349;29695;684516;191573;116695;282838;83731;29639;81658	Atp1a2;Chrng;Gria1;Scn4b;Clic1;Atp1a3;Kcnk2;Scn10a;Atp1b4;Scn2b;Gabrr2;Kcnc4;Grin3a;Kcnd1;Gm2a;Kcnma1;Fxyd2;Gabrp
GO:0042629	mast cell granule	2	16	0.326822	1	317676;81511	Lat2;Lat
GO:0001891	phagocytic cup	2	16	0.326822	1	306071;29427	Lcp1;Aif1
GO:0030128	clathrin coat of endocytic vesicle	1	5	0.3308	1	65046	Ap2s1
GO:0000015	phosphopyruvate hydratase complex	1	5	0.3308	1	24333	Eno1
GO:0000220	vacuolar proton-transporting V-type ATPase, V0 domain	1	5	0.3308	1	293650	Tcirg1
GO:0097197	tetraspanin-enriched microdomain	1	5	0.3308	1	691993	Scimp
GO:0005902	microvillus	6	67	0.334572	1	89804;192211;117596;266714;685232;316521	Tek;Prom2;Atp6v1b2;Myo7a;Atp6v1a;Vil1
GO:0005814	centriole	5	54	0.334868	1	294074;117524;360243;310344;64041	Cep55;Ccnf;Top2a;Plk4;Birc5
GO:0043235	receptor complex	17	216	0.341267	1	64357;24498;362800;50592;25054;448830;191573;289747;498075;25046;25083;25453;688730;24875;60350;25753;58966	Cd200r1;Il6;Itgb8;Gria1;Ntrk2;Ly96;Grin3a;Osm;Trat1;Pigr;Adra2a;Gdnf;Gpr84;Vipr1;Cd14;Chrng;Ramp2
GO:0008021	synaptic vesicle	10	121	0.342443	1	117038;50592;170897;65178;117558;60566;59267;81820;65171;25017	Mt3;Gria1;Sphk1;Snap91;Mylk2;Syt8;Syt7;Doc2b;Scamp5;Myo5a
GO:0033178	proton-transporting two-sector ATPase complex, catalytic domain	2	17	0.351007	1	117596;685232	Atp6v1b2;Atp6v1a
GO:0030660	Golgi-associated vesicle membrane	3	30	0.361474	1	65046;24392;50568	Ap2s1;Gja1;Cspg5
GO:0031253	cell projection membrane	14	178	0.362703	1	691993;50592;298340;29440;83567;29242;191575;81651;192211;171049;29427;29290;80900;24310	Scimp;Gria1;Slc6a14;Slc26a4;Mchr1;Car4;Nme1;Cspg4;Prom2;Folr1;Aif1;Adora1;Slco1a5;Ace
GO:0045335	phagocytic vesicle	4	43	0.362742	1	365042;501854;361689;170568	Rab32;Rab7b;Unc93b1;Dmbt1
GO:0036477	somatodendritic compartment	45	611	0.366415	1	25728;25154;25054;24832;24950;24212;24213;29213;54296;25364;24890;29427;259243;246118;25017;79129;24770;24476;309650;81743;83731;85266;29290;25415;84510;50592;191573;311546;117558;24807;116649;25557;497979;29366;29221;24482;113976;83620;362235;287526;116695;65199;66021;25589;288512	Apoe;Pgr;Ntrk2;Thy1;Srd5a1;Atp1a2;Atp1a3;Tubb4a;Rgs7;Asic2;Esr1;Aif1;Kcnip4;Tubb3;Myo5a;Cyba;Ccl2;Iapp;Cpne5;Pde2a;Kcnma1;Prss12;Adora1;Crmp1;Stmn2;Gria1;Grin3a;Tpx2;Mylk2;Tacr1;Kcnj4;Star;Tmem100;Serpine2;Arg1;Igf1;Acsl4;Cit;Syndig1;Serpinf1;Kcnd1;Kcnip3;Cybb;Kdr;Elfn1
GO:0012505	endomembrane system	166	2329	0.370197	1	29597;288617;79431;60566;29599;296846;315215;25375;24310;84012;361422;286894;29465;29692;81869;295934;29610;83731;29290;84493;84491;365042;65161;292935;24770;292848;266684;311374;83620;50672;50671;25544;294286;83627;288026;24464;25589;292306;266758;25350;361689;406864;29584;170899;25054;24832;298068;59267;364754;116720;83792;246074;316583;688090;29230;291675;361527;79129;25427;24476;89824;306748;…	P2ry2;Tpst1;Bhlhe40;Syt8;Atp2b3;Hepacam2;Mlc1;Aldh3a1;Ace;Slc1a6;Cotl1;Parm1;Trpv2;Pla2g2a;Gstm7;Chst1;Tgfbr3;Kcnma1;Adora1;Fmo3;Qsox1;Rab32;Litaf;Htatip2;Ccl2;Klk13;Cyp2d1;Duoxa1;Cit;Ednrb;Fasn;Sele;Kifc1;Galnt5;Atp13a4;Hp;Kdr;Rnaset2;Sec11c;Sftpd;Unc93b1;Clic1;Gjb1;Kcnk2;Ntrk2;Thy1;Sec61b;Syt7;Fzd8;Pik3c2g;Scd;Scd1;B3gnt7;RT1-Bb;Sqle;Mzb1;Pld3;Cyba;Cyp51;Iapp;Chi3l1;Cxcl14;Pde2a;Snx8;Sftpa1;Slc…
GO:0044233	ER-mitochondrion membrane contact site	1	6	0.374133	1	113976	Acsl4
GO:0044232	organelle membrane contact site	1	6	0.374133	1	113976	Acsl4
GO:0005885	Arp2/3 protein complex	1	6	0.374133	1	54227	Arpc1b
GO:0044217	other organism part	1	6	0.374133	1	406161	C4b
GO:0044216	other organism cell	1	6	0.374133	1	406161	C4b
GO:0016461	unconventional myosin complex	1	6	0.374133	1	266714	Myo7a
GO:0008290	F-actin capping protein complex	1	6	0.374133	1	24171	Add2
GO:0044215	other organism	1	6	0.374133	1	406161	C4b
GO:0043245	extraorganismal space	1	6	0.374133	1	406161	C4b
GO:0043073	germ cell nucleus	2	18	0.374882	1	500987;292206	H2afx;Trip13
GO:0005640	nuclear outer membrane	2	18	0.374882	1	114097;64191	Ltc4s;Dhcr7
GO:0097481	neuronal postsynaptic density	2	18	0.374882	1	294043;25054	Sorcs3;Ntrk2
GO:0045171	intercellular bridge	3	31	0.379469	1	294074;500545;114482	Cep55;Cdca8;Nek2
GO:0005720	nuclear heterochromatin	3	31	0.379469	1	680522;58940;316129	Hist1h1b;H2afz;Uhrf1
GO:0043209	myelin sheath	4	45	0.392681	1	24213;29213;24950;78960	Atp1a3;Tubb4a;Srd5a1;Prx
GO:0030658	transport vesicle membrane	4	45	0.392681	1	170568;65046;29242;29186	Dmbt1;Ap2s1;Car4;Cd63
GO:0034707	chloride channel complex	3	32	0.39735	1	29695;81658;406864	Gabrr2;Gabrp;Clic1
GO:0031672	A band	2	19	0.398387	1	311167;140939	Smtnl1;Trim63
GO:0005680	anaphase-promoting complex	2	19	0.398387	1	64515;296368	Cdc20;Ube2c
GO:0016235	aggresome	2	19	0.398387	1	361623;29168	Trim66;Ubd
GO:0010008	endosome membrane	14	185	0.41395	1	361244;306283;286894;25553;294269;362235;25054;25046;170824;65171;29186;288504;192249;317170	RGD1307443;Anxa8;Parm1;Slc6a4;RT1-Da;Syndig1;Ntrk2;Pigr;Steap3;Scamp5;Cd63;Snx8;Ehd3;Slc9a7
GO:0044440	endosomal part	14	185	0.41395	1	361244;306283;286894;25553;294269;362235;25054;25046;170824;65171;29186;288504;192249;317170	RGD1307443;Anxa8;Parm1;Slc6a4;RT1-Da;Syndig1;Ntrk2;Pigr;Steap3;Scamp5;Cd63;Snx8;Ehd3;Slc9a7
GO:0000788	nuclear nucleosome	1	7	0.41466	1	291100	Irf4
GO:0042587	glycogen granule	1	7	0.41466	1	50671	Fasn
GO:0031616	spindle pole centrosome	1	7	0.41466	1	289997	Dlgap5
GO:0030130	clathrin coat of trans-Golgi network vesicle	1	7	0.41466	1	65046	Ap2s1
GO:0000792	heterochromatin	5	61	0.426217	1	680522;294071;58940;316129;293733	Hist1h1b;Hells;H2afz;Uhrf1;Incenp
GO:0005875	microtubule associated complex	7	89	0.429523	1	293502;500545;171304;294286;361308;64041;171529	Kif22;Cdca8;Kif11;Kifc1;Kif20a;Birc5;Kif2c
GO:0005911	cell-cell junction	21	286	0.429789	1	290485;29584;89804;79217;24392;84403;24778;116680;308099;84492;24251;315611;289229;81511;170913;315215;310621;65048;24891;316330;65034	Cldn10;Gjb1;Tek;Gja3;Gja1;Gjb6;Slc2a1;Ptpru;Fndc1;Tec;Cd53;Scn4b;Vangl2;Lat;Abcb1a;Mlc1;Iqgap3;Fat2;Abcb4;Ankrd23;Pdzd2
GO:0030133	transport vesicle	9	117	0.430331	1	360034;170568;289229;29242;25046;54242;65046;29186;80977	Myrip;Dmbt1;Vangl2;Car4;Pigr;Cpa3;Ap2s1;Cd63;Syt13
GO:0016469	proton-transporting two-sector ATPase complex	4	48	0.437123	1	117596;685232;293650;297932	Atp6v1b2;Atp6v1a;Tcirg1;Atp6v0d2
GO:0043197	dendritic spine	9	119	0.448963	1	117558;50592;25154;362235;25054;24212;24213;29290;25364	Mylk2;Gria1;Pgr;Syndig1;Ntrk2;Atp1a2;Atp1a3;Adora1;Asic2
GO:0042611	MHC protein complex	3	35	0.450016	1	294269;24988;688090	RT1-Da;RT1-M2;RT1-Bb
GO:0012510	trans-Golgi network transport vesicle membrane	1	8	0.452563	1	65046	Ap2s1
GO:0031254	cell trailing edge	1	8	0.452563	1	691993	Scimp
GO:0030669	clathrin-coated endocytic vesicle membrane	1	8	0.452563	1	65046	Ap2s1
GO:0001931	uropod	1	8	0.452563	1	691993	Scimp
GO:0032593	insulin-responsive compartment	1	8	0.452563	1	25017	Myo5a
GO:0030904	retromer complex	1	8	0.452563	1	288504	Snx8
GO:0008278	cohesin complex	1	8	0.452563	1	684771	Cdca5
GO:0042627	chylomicron	1	8	0.452563	1	25728	Apoe
GO:0070822	Sin3-type complex	1	8	0.452563	1	155430	Hey2
GO:0070852	cell body fiber	1	8	0.452563	1	24950	Srd5a1
GO:0016580	Sin3 complex	1	8	0.452563	1	155430	Hey2
GO:0044309	neuron spine	9	120	0.458247	1	117558;50592;25154;362235;25054;24212;24213;29290;25364	Mylk2;Gria1;Pgr;Syndig1;Ntrk2;Atp1a2;Atp1a3;Adora1;Asic2
GO:0030139	endocytic vesicle	7	92	0.461511	1	365042;501854;361689;170568;65046;24770;192249	Rab32;Rab7b;Unc93b1;Dmbt1;Ap2s1;Ccl2;Ehd3
GO:0030173	integral component of Golgi membrane	2	23	0.487776	1	313339;84491	Acer2;Qsox1
GO:0031258	lamellipodium membrane	1	9	0.488012	1	81651	Cspg4
GO:0034362	low-density lipoprotein particle	1	9	0.488012	1	25728	Apoe
GO:0031588	AMP-activated protein kinase complex	1	9	0.488012	1	301518	Prkag3
GO:0060187	cell pole	1	9	0.488012	1	289229	Vangl2
GO:0030132	clathrin coat of coated pit	1	9	0.488012	1	65046	Ap2s1
GO:0001520	outer dense fiber	1	9	0.488012	1	25425	Ctsh
GO:0005641	nuclear envelope lumen	1	9	0.488012	1	59103	Ptges
GO:0032584	growth cone membrane	1	9	0.488012	1	29465	Trpv2
GO:0045179	apical cortex	1	9	0.488012	1	282838	Gm2a
GO:0008076	voltage-gated potassium channel complex	4	52	0.494771	1	170899;684516;116695;83731	Kcnk2;Kcnc4;Kcnd1;Kcnma1
GO:0005789	endoplasmic reticulum membrane	37	529	0.500342	1	266758;287450;170899;24950;83792;246074;25427;29230;114097;361527;287633;286896;311374;24299;54246;83731;113976;24451;498840;50592;170635;171394;25256;64191;24886;140910;84493;266684;24392;246245;50568;50549;25086;300211;288026;116831;314438	Sec11c;Slc16a11;Kcnk2;Srd5a1;Scd;Scd1;Cyp51;Sqle;Ltc4s;Pld3;Lrrc59;Sgpl1;Duoxa1;Cyp2a3;Cyp2f4;Kcnma1;Acsl4;Hmox1;Tmem173;Gria1;Dhrs9;Clstn2;Fmo1;Dhcr7;Tbxas1;Msmo1;Fmo3;Cyp2d1;Gja1;Fmo2;Cspg5;Cyp4a1;Cyp2e1;Fkbp11;Atp13a4;Fxyd3;Degs2
GO:0030118	clathrin coat	3	38	0.500696	1	29571;65046;65178	Scn10a;Ap2s1;Snap91
GO:0030424	axon	24	342	0.50458	1	170897;25054;684516;24213;29213;65199;25017;25154;29465;246118;24890;81743;83731;85266;29290;24191;78960;84510;50592;311546;117558;24770;29571;287526	Sphk1;Ntrk2;Kcnc4;Atp1a3;Tubb4a;Kcnip3;Myo5a;Pgr;Trpv2;Tubb3;Esr1;Pde2a;Kcnma1;Prss12;Adora1;Aldoc;Prx;Stmn2;Gria1;Tpx2;Mylk2;Ccl2;Scn10a;Serpinf1
GO:0043204	perikaryon	6	82	0.50866	1	25154;25054;497979;24770;29427;24890	Pgr;Ntrk2;Tmem100;Ccl2;Aif1;Esr1
GO:0034705	potassium channel complex	4	53	0.508797	1	170899;684516;116695;83731	Kcnk2;Kcnc4;Kcnd1;Kcnma1
GO:0001917	photoreceptor inner segment	2	24	0.508799	1	266714;365901	Myo7a;Gnat2
GO:0033177	proton-transporting two-sector ATPase complex, proton-transporting domain	2	24	0.508799	1	293650;297932	Tcirg1;Atp6v0d2
GO:0055037	recycling endosome	6	83	0.519816	1	25046;65171;315215;25017;192249;317170	Pigr;Scamp5;Mlc1;Myo5a;Ehd3;Slc9a7
GO:0097038	perinuclear endoplasmic reticulum	1	10	0.521165	1	79129	Cyba
GO:0042101	T cell receptor complex	1	10	0.521165	1	498075	Trat1
GO:0035686	sperm fibrous sheath	1	10	0.521165	1	24533	Ldha
GO:0030673	axolemma	1	10	0.521165	1	29290	Adora1
GO:0045202	synapse	38	549	0.52445	1	170897;25054;171394;60566;684516;24213;24333;294043;24890;117038;26989;29695;25017;24770;81820;65178;81743;83731;85266;29290;25753;65034;360034;50592;191573;117558;116649;29366;25364;114511;24212;59267;362235;25083;65171;266714;81658;288512	Sphk1;Ntrk2;Clstn2;Syt8;Kcnc4;Atp1a3;Eno1;Sorcs3;Esr1;Mt3;Cadps;Gabrr2;Myo5a;Ccl2;Doc2b;Snap91;Pde2a;Kcnma1;Prss12;Adora1;Chrng;Pdzd2;Myrip;Gria1;Grin3a;Mylk2;Kcnj4;Serpine2;Asic2;Emb;Atp1a2;Syt7;Syndig1;Adra2a;Scamp5;Myo7a;Gabrp;Elfn1
GO:0044463	cell projection part	45	651	0.526034	1	25154;287526;25054;24832;684516;24213;29213;54296;294043;80900;24310;298340;29465;24533;24890;192213;192211;24770;25017;298692;58814;83731;85266;29290;25425;83567;84510;50592;311546;117558;362415;191575;64160;29427;25364;24212;691993;362235;29242;29440;81651;65199;266714;316521;171049	Pgr;Serpinf1;Ntrk2;Thy1;Kcnc4;Atp1a3;Tubb4a;Rgs7;Sorcs3;Slco1a5;Ace;Slc6a14;Trpv2;Ldha;Esr1;Rasgrf1;Prom2;Ccl2;Myo5a;Ttll10;Tmod2;Kcnma1;Prss12;Adora1;Ctsh;Mchr1;Stmn2;Gria1;Tpx2;Mylk2;Ttll3;Nme1;Basp1;Aif1;Asic2;Atp1a2;Scimp;Syndig1;Car4;Slc26a4;Cspg4;Kcnip3;Myo7a;Vil1;Folr1
GO:0031228	intrinsic component of Golgi membrane	2	25	0.529248	1	313339;84491	Acer2;Qsox1
GO:0014704	intercalated disc	3	40	0.533118	1	315611;24392;316330	Scn4b;Gja1;Ankrd23
GO:0045211	postsynaptic membrane	12	173	0.539825	1	25753;50592;191573;362235;25054;116649;171394;29695;83731;29290;81658;65178	Chrng;Gria1;Grin3a;Syndig1;Ntrk2;Kcnj4;Clstn2;Gabrr2;Kcnma1;Adora1;Gabrp;Snap91
GO:0097458	neuron part	64	931	0.540354	1	24191;25728;25154;25589;25054;24832;24950;684516;24213;24333;54296;25364;294043;24890;29427;308709;259243;170897;29465;246118;25017;79129;192213;64160;24770;24476;309650;58814;65178;81743;83731;85266;29290;365901;360034;78960;25415;84510;50592;191573;311546;24848;24807;116649;25557;117558;497979;25553;29366;29221;24482;113976;83620;24212;29571;287526;29213;116695;65199;65034;66021;362235;266714;2…	Aldoc;Apoe;Pgr;Kdr;Ntrk2;Thy1;Srd5a1;Kcnc4;Atp1a3;Eno1;Rgs7;Asic2;Sorcs3;Esr1;Aif1;Synm;Kcnip4;Sphk1;Trpv2;Tubb3;Myo5a;Cyba;Rasgrf1;Basp1;Ccl2;Iapp;Cpne5;Tmod2;Snap91;Pde2a;Kcnma1;Prss12;Adora1;Gnat2;Myrip;Prx;Crmp1;Stmn2;Gria1;Grin3a;Tpx2;Tph1;Tacr1;Kcnj4;Star;Mylk2;Tmem100;Slc6a4;Serpine2;Arg1;Igf1;Acsl4;Cit;Atp1a2;Scn10a;Serpinf1;Tubb4a;Kcnd1;Kcnip3;Pdzd2;Cybb;Syndig1;Myo7a;Elfn1
GO:0016328	lateral plasma membrane	3	41	0.548874	1	24392;289229;310621	Gja1;Vangl2;Iqgap3
GO:0060170	ciliary membrane	2	26	0.549107	1	83567;192211	Mchr1;Prom2
GO:0044450	microtubule organizing center part	5	71	0.5511	1	294074;117524;360243;310344;64041	Cep55;Ccnf;Top2a;Plk4;Birc5
GO:0042589	zymogen granule membrane	1	11	0.552172	1	170568	Dmbt1
GO:0017146	N-methyl-D-aspartate selective glutamate receptor complex	1	11	0.552172	1	191573	Grin3a
GO:0005865	striated muscle thin filament	1	11	0.552172	1	29437	Acta1
GO:0005916	fascia adherens	1	11	0.552172	1	24392	Gja1
GO:0044292	dendrite terminus	1	11	0.552172	1	54296	Rgs7
GO:0042175	nuclear outer membrane-endoplasmic reticulum membrane network	37	542	0.557095	1	266758;287450;170899;24950;83792;246074;25427;29230;114097;361527;287633;286896;311374;24299;54246;83731;113976;24451;498840;50592;170635;171394;25256;64191;24886;140910;84493;266684;24392;246245;50568;50549;25086;300211;288026;116831;314438	Sec11c;Slc16a11;Kcnk2;Srd5a1;Scd;Scd1;Cyp51;Sqle;Ltc4s;Pld3;Lrrc59;Sgpl1;Duoxa1;Cyp2a3;Cyp2f4;Kcnma1;Acsl4;Hmox1;Tmem173;Gria1;Dhrs9;Clstn2;Fmo1;Dhcr7;Tbxas1;Msmo1;Fmo3;Cyp2d1;Gja1;Fmo2;Cspg5;Cyp4a1;Cyp2e1;Fkbp11;Atp13a4;Fxyd3;Degs2
GO:0015629	actin cytoskeleton	20	294	0.562948	1	83620;306071;89804;304477;289229;114203;293783;363091;24171;296654;362107;24778;360034;54227;680280;266714;29427;316521;25017;29437	Cit;Lcp1;Tek;Kntc1;Vangl2;Sh2b2;Lpxn;Myzap;Add2;Gsn;Aif1l;Slc2a1;Myrip;Arpc1b;Gas2l3;Myo7a;Aif1;Vil1;Myo5a;Acta1
GO:0044432	endoplasmic reticulum part	41	602	0.56337	1	266758;287450;170899;171394;83792;246074;25427;29230;291675;114097;361527;287633;286896;311374;79129;24299;54246;83731;113976;24451;498840;50592;170635;24950;25256;64191;24886;140910;84493;266684;24392;246245;50568;50549;25086;100362805;300211;288026;116831;314438;292306	Sec11c;Slc16a11;Kcnk2;Clstn2;Scd;Scd1;Cyp51;Sqle;Mzb1;Ltc4s;Pld3;Lrrc59;Sgpl1;Duoxa1;Cyba;Cyp2a3;Cyp2f4;Kcnma1;Acsl4;Hmox1;Tmem173;Gria1;Dhrs9;Srd5a1;Fmo1;Dhcr7;Tbxas1;Msmo1;Fmo3;Cyp2d1;Gja1;Fmo2;Cspg5;Cyp4a1;Cyp2e1;Txndc5;Fkbp11;Atp13a4;Fxyd3;Degs2;Rnaset2
GO:0005905	coated pit	3	42	0.564312	1	25544;65046;65178	Sele;Ap2s1;Snap91
GO:0031256	leading edge membrane	6	88	0.573951	1	691993;50592;191575;81651;29427;29290	Scimp;Gria1;Nme1;Cspg4;Aif1;Adora1
GO:0044448	cell cortex part	6	88	0.573951	1	360034;363091;299339;24778;25544;282838	Myrip;Myzap;Tnfaip2;Slc2a1;Sele;Gm2a
GO:0044291	cell-cell contact zone	3	43	0.579421	1	315611;24392;316330	Scn4b;Gja1;Ankrd23
GO:0030315	T-tubule	3	43	0.579421	1	24212;24890;50599	Atp1a2;Esr1;Kcnj3
GO:0031594	neuromuscular junction	3	43	0.579421	1	684516;50592;29366	Kcnc4;Gria1;Serpine2
GO:0030061	mitochondrial crista	1	12	0.58117	1	25557	Star
GO:0005856	cytoskeleton	91	1339	0.583421	1	313840;29213;308761;294043;361422;24392;246118;315298;363198;29290;84492;294074;89804;360243;191573;117558;191575;289054;25515;83620;24383;289229;294286;58814;114203;25728;25054;64515;117524;25203;25686;306071;50665;293783;24778;298692;289997;50592;360621;308064;362235;291081;306575;29437;65178;500377;363091;304477;310344;25544;315318;360161;311325;54227;29427;296846;25415;54237;362415;500464;311…	Rmdn2;Tubb4a;Prc1;Sorcs3;Cotl1;Gja1;Tubb3;Racgap1;Cenpq;Adora1;Tec;Cep55;Tek;Top2a;Grin3a;Mylk2;Nme1;Aspm;Plk1;Cit;Gapdh;Vangl2;Kifc1;Tmod2;Sh2b2;Apoe;Ntrk2;Cdc20;Ccnf;Ccnb1;Gnai1;Lcp1;Tmsb10;Lpxn;Slc2a1;Ttll10;Dlgap5;Gria1;Cdc6;Cep72;Syndig1;Tubb2b;Ckap2;Acta1;Snap91;Tuba8;Myzap;Kntc1;Plk4;Sele;Krt80;Nek6;Knstrn;Arpc1b;Aif1;Hepacam2;Crmp1;Cdk1;Ttll3;Epb41l4b;Nusap1;Slc16a1;Cdca8;Tuba1c;Birc5;Ptp…
GO:0030666	endocytic vesicle membrane	2	28	0.587027	1	170568;65046	Dmbt1;Ap2s1
GO:0042734	presynaptic membrane	4	59	0.588841	1	29290;65178;81743;83731	Adora1;Snap91;Pde2a;Kcnma1
GO:0031901	early endosome membrane	3	44	0.594195	1	361244;288504;362235	RGD1307443;Snx8;Syndig1
GO:0097610	cell surface furrow	2	29	0.605078	1	294074;315298	Cep55;Racgap1
GO:0032154	cleavage furrow	2	29	0.605078	1	294074;315298	Cep55;Racgap1
GO:0031201	SNARE complex	2	29	0.605078	1	81820;65171	Doc2b;Scamp5
GO:0043034	costamere	1	13	0.608291	1	308709	Synm
GO:0030125	clathrin vesicle coat	1	13	0.608291	1	65046	Ap2s1
GO:0005942	phosphatidylinositol 3-kinase complex	1	13	0.608291	1	116720	Pik3c2g
GO:0034364	high-density lipoprotein particle	1	13	0.608291	1	25728	Apoe
GO:0045334	clathrin-coated endocytic vesicle	1	13	0.608291	1	65046	Ap2s1
GO:0035327	transcriptionally active chromatin	1	13	0.608291	1	24890	Esr1
GO:0036379	myofilament	1	13	0.608291	1	29437	Acta1
GO:0016234	inclusion body	3	45	0.608626	1	117038;361623;29168	Mt3;Trim66;Ubd
GO:0043228	non-membrane-bounded organelle	185	2726	0.614641	1	361923;311723;79431;689399;29213;308761;361232;294043;100912290;50719;361422;24392;360559;306970;246118;361623;315298;502125;499933;680097;363198;29290;84492;502129;360034;246781;89804;313840;360243;294071;191573;291100;191575;24787;307126;289054;100360950;25515;83620;24383;289229;25544;294286;259235;680531;81639;305984;691488;100365043;292301;305827;313108;114203;316129;25054;54237;680322;117254…	Rpl22l1;Sox18;Bhlhe40;Cenpw;Tubb4a;Prc1;Pak1ip1;Sorcs3;LOC100912290;Slc7a5;Cotl1;Gja1;Fam64a;Hist1h2an;Tubb3;Trim66;Racgap1;Hist1h2ah;Dsn1;LOC680097;Cenpq;Adora1;Tec;Hist1h2ai;Myrip;Ptpn7;Tek;Rmdn2;Top2a;Hells;Grin3a;Irf4;Nme1;Sod2;Mcm10;Aspm;LOC100360950;Plk1;Cit;Gapdh;Vangl2;Sele;Kifc1;Sdr9c7;Sapcd2;Alox15;Cdca2;Hist3h2bb;LOC100365043;T;Wdhd1;Mms22l;Sh2b2;Uhrf1;Ntrk2;Cdk1;LOC680322;Prdx1;Asf1b;…
GO:0043232	intracellular non-membrane-bounded organelle	185	2726	0.614641	1	361923;311723;79431;689399;29213;308761;361232;294043;100912290;50719;361422;24392;360559;306970;246118;361623;315298;502125;499933;680097;363198;29290;84492;502129;360034;246781;89804;313840;360243;294071;191573;291100;191575;24787;307126;289054;100360950;25515;83620;24383;289229;25544;294286;259235;680531;81639;305984;691488;100365043;292301;305827;313108;114203;316129;25054;54237;680322;117254…	Rpl22l1;Sox18;Bhlhe40;Cenpw;Tubb4a;Prc1;Pak1ip1;Sorcs3;LOC100912290;Slc7a5;Cotl1;Gja1;Fam64a;Hist1h2an;Tubb3;Trim66;Racgap1;Hist1h2ah;Dsn1;LOC680097;Cenpq;Adora1;Tec;Hist1h2ai;Myrip;Ptpn7;Tek;Rmdn2;Top2a;Hells;Grin3a;Irf4;Nme1;Sod2;Mcm10;Aspm;LOC100360950;Plk1;Cit;Gapdh;Vangl2;Sele;Kifc1;Sdr9c7;Sapcd2;Alox15;Cdca2;Hist3h2bb;LOC100365043;T;Wdhd1;Mms22l;Sh2b2;Uhrf1;Ntrk2;Cdk1;LOC680322;Prdx1;Asf1b;…
GO:0005813	centrosome	20	304	0.619642	1	294074;360243;308064;64515;298884;54237;310344;191575;306575;114482;117524;309523;25203;64041;25027;289997;315330;25686;296846;25515	Cep55;Top2a;Cep72;Cdc20;Gen1;Cdk1;Plk4;Nme1;Ckap2;Nek2;Ccnf;Kif20b;Ccnb1;Birc5;Slc16a1;Dlgap5;Espl1;Gnai1;Hepacam2;Plk1
GO:0030864	cortical actin cytoskeleton	2	30	0.622523	1	24778;363091	Slc2a1;Myzap
GO:0032155	cell division site part	2	30	0.622523	1	294074;315298	Cep55;Racgap1
GO:0032153	cell division site	2	30	0.622523	1	294074;315298	Cep55;Racgap1
GO:0005925	focal adhesion	20	305	0.625129	1	306071;293502;116640;24392;306279;293783;500996;102555453;24832;362107;296654;50692;306636;81651;54227;100360977;501015;361303;192249;81707	Lcp1;Kif22;Tnc;Gja1;Arhgap22;Lpxn;Layn;LOC102555453;Thy1;Aif1l;Gsn;Plaur;Efnb2;Cspg4;Arpc1b;LOC100360977;C2cd4b;Lims2;Ehd3;Mmp14
GO:0097060	synaptic membrane	14	215	0.626245	1	25753;50592;191573;362235;25054;116649;171394;29695;24333;81743;83731;29290;81658;65178	Chrng;Gria1;Grin3a;Syndig1;Ntrk2;Kcnj4;Clstn2;Gabrr2;Eno1;Pde2a;Kcnma1;Adora1;Gabrp;Snap91
GO:0034703	cation channel complex	7	109	0.630345	1	170899;29571;25349;684516;315611;116695;83731	Kcnk2;Scn10a;Scn2b;Kcnc4;Scn4b;Kcnd1;Kcnma1
GO:0005635	nuclear envelope	16	246	0.631453	1	114097;361422;116720;287633;406864;29244;192211;50672;25728;362720;297339;64191;292935;84396;59103;171411	Ltc4s;Cotl1;Pik3c2g;Lrrc59;Clic1;Gch1;Prom2;Ednrb;Apoe;Rrm2;Capg;Dhcr7;Htatip2;Atp1b4;Ptges;Tmem176b
GO:0034385	triglyceride-rich lipoprotein particle	1	14	0.633656	1	25728	Apoe
GO:0001741	XY body	1	14	0.633656	1	500987	H2afx
GO:0034361	very-low-density lipoprotein particle	1	14	0.633656	1	25728	Apoe
GO:0005657	replication fork	3	47	0.636441	1	316129;313108;500987	Uhrf1;Mms22l;H2afx
GO:0031252	cell leading edge	15	232	0.638198	1	83620;306071;293693;84510;50592;114203;296654;191575;117596;81651;691993;29427;29290;316521;25017	Cit;Lcp1;Cdc42bpg;Stmn2;Gria1;Sh2b2;Gsn;Nme1;Atp6v1b2;Cspg4;Scimp;Aif1;Adora1;Vil1;Myo5a
GO:0034702	ion channel complex	13	203	0.646852	1	29695;25753;50592;406864;315611;170899;29571;25349;684516;191573;116695;83731;81658	Gabrr2;Chrng;Gria1;Clic1;Scn4b;Kcnk2;Scn10a;Scn2b;Kcnc4;Grin3a;Kcnd1;Kcnma1;Gabrp
GO:0031902	late endosome membrane	3	48	0.649819	1	294269;306283;29186	RT1-Da;Anxa8;Cd63
GO:0031513	nonmotile primary cilium	5	80	0.650978	1	266714;360034;25017;365901;83567	Myo7a;Myrip;Myo5a;Gnat2;Mchr1
GO:0005924	cell-substrate adherens junction	20	310	0.651998	1	306071;293502;116640;24392;306279;293783;500996;102555453;24832;362107;296654;50692;306636;81651;54227;100360977;501015;361303;192249;81707	Lcp1;Kif22;Tnc;Gja1;Arhgap22;Lpxn;Layn;LOC102555453;Thy1;Aif1l;Gsn;Plaur;Efnb2;Cspg4;Arpc1b;LOC100360977;C2cd4b;Lims2;Ehd3;Mmp14
GO:0042588	zymogen granule	1	15	0.657378	1	170568	Dmbt1
GO:0002102	podosome	1	15	0.657378	1	293783	Lpxn
GO:0005892	acetylcholine-gated channel complex	1	15	0.657378	1	25753	Chrng
GO:0000421	autophagic vacuole membrane	1	15	0.657378	1	192129	Vmp1
GO:0005912	adherens junction	23	357	0.660662	1	500996;24832;296654;501015;287129;308709;293502;24392;102555453;293783;54227;65048;81707;116640;306071;362107;100360977;361303;192249;306279;50692;306636;81651	Layn;Thy1;Gsn;C2cd4b;Tmem204;Synm;Kif22;Gja1;LOC102555453;Lpxn;Arpc1b;Fat2;Mmp14;Tnc;Lcp1;Aif1l;LOC100360977;Lims2;Ehd3;Arhgap22;Plaur;Efnb2;Cspg4
GO:0030055	cell-substrate junction	20	312	0.662468	1	306071;293502;116640;24392;306279;293783;500996;102555453;24832;362107;296654;50692;306636;81651;54227;100360977;501015;361303;192249;81707	Lcp1;Kif22;Tnc;Gja1;Arhgap22;Lpxn;Layn;LOC102555453;Thy1;Aif1l;Gsn;Plaur;Efnb2;Cspg4;Arpc1b;LOC100360977;C2cd4b;Lims2;Ehd3;Mmp14
GO:0030863	cortical cytoskeleton	3	49	0.662841	1	25544;363091;24778	Sele;Myzap;Slc2a1
GO:0032589	neuron projection membrane	2	33	0.671261	1	29290;50592	Adora1;Gria1
GO:0030425	dendrite	26	406	0.677803	1	25728;25154;25054;24832;24212;24213;54296;259243;246118;79129;81743;83731;85266;29290;25415;50592;191573;117558;24807;116649;24770;25364;362235;65199;66021;288512	Apoe;Pgr;Ntrk2;Thy1;Atp1a2;Atp1a3;Rgs7;Kcnip4;Tubb3;Cyba;Pde2a;Kcnma1;Prss12;Adora1;Crmp1;Gria1;Grin3a;Mylk2;Tacr1;Kcnj4;Ccl2;Asic2;Syndig1;Kcnip3;Cybb;Elfn1
GO:0014069	postsynaptic density	9	146	0.678973	1	117558;50592;191573;362235;25054;65034;29290;294043;65178	Mylk2;Gria1;Grin3a;Syndig1;Ntrk2;Pdzd2;Adora1;Sorcs3;Snap91
GO:0031528	microvillus membrane	1	16	0.679565	1	192211	Prom2
GO:0032420	stereocilium	1	16	0.679565	1	266714	Myo7a
GO:0042645	mitochondrial nucleoid	2	34	0.68633	1	24787;287633	Sod2;Lrrc59
GO:0009295	nucleoid	2	34	0.68633	1	24787;287633	Sod2;Lrrc59
GO:0005930	axoneme	3	51	0.687818	1	298692;362415;25425	Ttll10;Ttll3;Ctsh
GO:0097014	ciliary cytoplasm	3	51	0.687818	1	298692;362415;25425	Ttll10;Ttll3;Ctsh
GO:0005798	Golgi-associated vesicle	3	51	0.687818	1	65046;24392;50568	Ap2s1;Gja1;Cspg5
GO:0043234	protein complex	203	3035	0.693253	1	361308;293650;313840;689399;24498;688730;54296;25503;100912290;304477;24392;246118;315298;296368;502125;289185;29610;83731;29292;54264;502129;311336;360034;89804;360243;58966;191573;291100;191575;363227;25453;29200;24383;311723;289054;100360950;60350;24773;25515;89788;25448;79217;291159;29687;29213;302976;306962;24464;691488;100365043;294286;29452;313108;114203;362634;25728;406864;170899;25054;54…	Kif20a;Tcirg1;Rmdn2;Cenpw;Il6;Gpr84;Rgs7;Ocm2;LOC100912290;Kntc1;Gja1;Tubb3;Racgap1;Ube2c;Hist1h2ah;Creg1;Tgfbr3;Kcnma1;Ftl1;Mafb;Hist1h2ai;Nusap1;Myrip;Tek;Top2a;Ramp2;Grin3a;Irf4;Nme1;Nabp1;Gdnf;Inhba;Gapdh;Sox18;Aspm;LOC100360950;Cd14;Sftpa1;Plk1;Gna15;Cenpi;Gja3;Hist1h2ail;C1qb;Tubb4a;Noxo1;Hist1h2ac;Hp;Hist3h2bb;LOC100365043;Kifc1;Epas1;Mms22l;Sh2b2;C1qc;Apoe;Clic1;Kcnk2;Ntrk2;Cdk1;LOC680322…
GO:0044456	synapse part	26	410	0.695421	1	170897;25054;171394;60566;59267;24333;294043;25017;29695;24890;81820;81743;83731;85266;29290;25753;65171;50592;191573;117558;116649;117038;362235;65034;81658;65178	Sphk1;Ntrk2;Clstn2;Syt8;Syt7;Eno1;Sorcs3;Myo5a;Gabrr2;Esr1;Doc2b;Pde2a;Kcnma1;Prss12;Adora1;Chrng;Scamp5;Gria1;Grin3a;Mylk2;Kcnj4;Mt3;Syndig1;Pdzd2;Gabrp;Snap91
GO:0070161	anchoring junction	23	365	0.698446	1	500996;24832;296654;501015;287129;308709;293502;24392;102555453;293783;54227;65048;81707;116640;306071;362107;100360977;361303;192249;306279;50692;306636;81651	Layn;Thy1;Gsn;C2cd4b;Tmem204;Synm;Kif22;Gja1;LOC102555453;Lpxn;Arpc1b;Fat2;Mmp14;Tnc;Lcp1;Aif1l;LOC100360977;Lims2;Ehd3;Arhgap22;Plaur;Efnb2;Cspg4
GO:0044447	axoneme part	1	17	0.700314	1	25425	Ctsh
GO:0035861	site of double-strand break	1	17	0.700314	1	500987	H2afx
GO:0044295	axonal growth cone	1	17	0.700314	1	29465	Trpv2
GO:0030054	cell junction	56	864	0.702674	1	363091;84403;500996;290644;24832;296654;170913;116640;50692;24891;316330;310621;290485;308709;293502;24392;102555453;293783;84492;24251;315611;54227;116680;501015;79217;287129;81707;65034;29584;89804;50592;26989;306071;191573;308099;362107;116649;81511;100360977;361303;192249;114511;25753;315215;289229;306279;362235;65048;315341;306636;29695;81651;65171;25589;81658;24778	Myzap;Gjb6;Layn;Ifi30;Thy1;Gsn;Abcb1a;Tnc;Plaur;Abcb4;Ankrd23;Iqgap3;Cldn10;Synm;Kif22;Gja1;LOC102555453;Lpxn;Tec;Cd53;Scn4b;Arpc1b;Ptpru;C2cd4b;Gja3;Tmem204;Mmp14;Pdzd2;Gjb1;Tek;Gria1;Cadps;Lcp1;Grin3a;Fndc1;Aif1l;Kcnj4;Lat;LOC100360977;Lims2;Ehd3;Emb;Chrng;Mlc1;Vangl2;Arhgap22;Syndig1;Fat2;Hoxc5;Efnb2;Gabrr2;Cspg4;Scamp5;Kdr;Gabrp;Slc2a1
GO:0001669	acrosomal vesicle	5	86	0.709103	1	291597;25425;60566;364018;311327	Trim36;Ctsh;Syt8;Ncf2;Casc5
GO:0030426	growth cone	7	119	0.71415	1	84510;29465;192213;25054;24832;58814;64160	Stmn2;Trpv2;Rasgrf1;Ntrk2;Thy1;Tmod2;Basp1
GO:0030659	cytoplasmic vesicle membrane	12	199	0.718614	1	360034;170568;365377;26989;303801;25651;50568;29242;116649;65046;29186;24392	Myrip;Dmbt1;Trim72;Cadps;Lamp3;Selp;Cspg5;Car4;Kcnj4;Ap2s1;Cd63;Gja1
GO:0098636	protein complex involved in cell adhesion	1	18	0.71972	1	362800	Itgb8
GO:0000407	pre-autophagosomal structure	1	18	0.71972	1	192129	Vmp1
GO:0008305	integrin complex	1	18	0.71972	1	362800	Itgb8
GO:0032590	dendrite membrane	1	18	0.71972	1	50592	Gria1
GO:0042383	sarcolemma	6	105	0.731472	1	24212;365377;29242;50599;81639;24890	Atp1a2;Trim72;Car4;Kcnj3;Alox15;Esr1
GO:0022625	cytosolic large ribosomal subunit	3	55	0.733541	1	100360781;299106;102555453	LOC100360781;Rpl10l;LOC102555453
GO:0005815	microtubule organizing center	23	373	0.733728	1	64515;114482;117524;25203;315330;25686;360161;310344;289997;296846;294074;25415;360243;54237;191575;298884;25027;25515;308064;294286;64041;306575;309523	Cdc20;Nek2;Ccnf;Ccnb1;Espl1;Gnai1;Nek6;Plk4;Dlgap5;Hepacam2;Cep55;Crmp1;Top2a;Cdk1;Nme1;Gen1;Slc16a1;Plk1;Cep72;Kifc1;Birc5;Ckap2;Kif20b
GO:0030427	site of polarized growth	7	122	0.736613	1	84510;29465;192213;25054;24832;58814;64160	Stmn2;Trpv2;Rasgrf1;Ntrk2;Thy1;Tmod2;Basp1
GO:0030670	phagocytic vesicle membrane	1	19	0.737869	1	170568	Dmbt1
GO:0016529	sarcoplasmic reticulum	2	38	0.74099	1	81869;29242	Gstm7;Car4
GO:0012506	vesicle membrane	13	220	0.748032	1	360034;170568;365377;26989;303801;25651;50568;29242;116649;65046;29186;24599;24392	Myrip;Dmbt1;Trim72;Cadps;Lamp3;Selp;Cspg5;Car4;Kcnj4;Ap2s1;Cd63;Nos2;Gja1
GO:0005913	cell-cell adherens junction	2	39	0.753313	1	65048;24392	Fat2;Gja1
GO:0030140	trans-Golgi network transport vesicle	1	20	0.754844	1	65046	Ap2s1
GO:0032588	trans-Golgi network membrane	1	20	0.754844	1	65171	Scamp5
GO:0034358	plasma lipoprotein particle	1	20	0.754844	1	25728	Apoe
GO:0043005	neuron projection	50	793	0.758722	1	25728;25154;25589;25054;24832;24950;684516;24213;29213;54296;25364;24890;259243;170897;29465;246118;25017;79129;192213;309650;58814;81743;83731;85266;29290;24191;78960;25415;84510;50592;191573;311546;24848;24807;116649;25557;117558;25553;24770;29221;24212;29571;287526;24333;65199;65034;66021;362235;64160;288512	Apoe;Pgr;Kdr;Ntrk2;Thy1;Srd5a1;Kcnc4;Atp1a3;Tubb4a;Rgs7;Asic2;Esr1;Kcnip4;Sphk1;Trpv2;Tubb3;Myo5a;Cyba;Rasgrf1;Cpne5;Tmod2;Pde2a;Kcnma1;Prss12;Adora1;Aldoc;Prx;Crmp1;Stmn2;Gria1;Grin3a;Tpx2;Tph1;Tacr1;Kcnj4;Star;Mylk2;Slc6a4;Ccl2;Arg1;Atp1a2;Scn10a;Serpinf1;Eno1;Kcnip3;Pdzd2;Cybb;Syndig1;Basp1;Elfn1
GO:0030134	ER to Golgi transport vesicle	1	21	0.770719	1	289229	Vangl2
GO:0000803	sex chromosome	1	21	0.770719	1	500987	H2afx
GO:0019005	SCF ubiquitin ligase complex	1	21	0.770719	1	117524	Ccnf
GO:0005886	plasma membrane	248	3756	0.774326	1	29597;317676;293650;499342;363091;293154;29599;24498;679975;308761;246138;361232;315215;316077;24493;684984;245920;50719;360492;24392;353250;29465;29695;315298;24251;315611;300027;29610;83731;85266;29290;311374;171099;500906;360034;78960;89804;293591;24904;89788;191573;65161;288589;362510;191575;25349;24383;60566;298504;304477;60350;286894;54289;83620;50676;293186;25054;50672;50671;25544;298857;2…	P2ry2;Lat2;Tcirg1;Cd274;Myzap;Folr2;Atp2b3;Il6;Gpr183;Prc1;Ly6i;Pak1ip1;Mlc1;Entpd3;Il1a;Cd300lg;Cxcl10;Slc7a5;Hn1l;Gja1;Niacr1;Trpv2;Gabrr2;Racgap1;Cd53;Scn4b;Gpihbp1;Tgfbr3;Kcnma1;Prss12;Adora1;Duoxa1;Rasd2;Cyth4;Myrip;Prx;Tek;Cd163l1;Slc22a1;Gna15;Grin3a;Litaf;Rasa4;Melk;Nme1;Scn2b;Gapdh;Syt8;Mfsd2a;Kntc1;Cd14;Parm1;Rgs1;Cit;Slc6a12;Lyve1;Ntrk2;Ednrb;Fasn;Sele;Gpr113;Cd300lf;Cspg5;P2ry6;Alox15…
GO:0044438	microbody part	3	60	0.78305	1	117254;81726;113898	Prdx1;Mvd;Prdx5
GO:0044439	peroxisomal part	3	60	0.78305	1	117254;81726;113898	Prdx1;Mvd;Prdx5
GO:0032994	protein-lipid complex	1	22	0.785566	1	25728	Apoe
GO:0032421	stereocilium bundle	1	22	0.785566	1	266714	Myo7a
GO:0030665	clathrin-coated vesicle membrane	1	22	0.785566	1	65046	Ap2s1
GO:0016459	myosin complex	2	42	0.78728	1	266714;25017	Myo7a;Myo5a
GO:0005788	endoplasmic reticulum lumen	3	61	0.791983	1	291675;100362805;292306	Mzb1;Txndc5;Rnaset2
GO:0005774	vacuolar membrane	11	197	0.795279	1	293650;117596;294269;65161;303801;192129;297932;29186;266714;685232;25686	Tcirg1;Atp6v1b2;RT1-Da;Litaf;Lamp3;Vmp1;Atp6v0d2;Cd63;Myo7a;Atp6v1a;Gnai1
GO:0031968	organelle outer membrane	7	131	0.796446	1	24392;25059;114097;64191;79223;29221;498840	Gja1;Hk2;Ltc4s;Dhcr7;Gk;Arg1;Tmem173
GO:0032587	ruffle membrane	2	43	0.79765	1	29427;191575	Aif1;Nme1
GO:0016528	sarcoplasm	2	43	0.79765	1	81869;29242	Gstm7;Car4
GO:0032391	photoreceptor connecting cilium	1	23	0.799451	1	266714	Myo7a
GO:0042612	MHC class I protein complex	1	23	0.799451	1	24988	RT1-M2
GO:0005882	intermediate filament	5	98	0.803983	1	308709;25017;24392;191575;315318	Synm;Myo5a;Gja1;Nme1;Krt80
GO:0005829	cytosol	77	1224	0.807622	1	498638;25330;300691;25510;50719;25059;89788;297594;25054;24832;296654;117254;100360781;24333;54296;25542;29592;24493;25017;54349;25425;246781;81726;25375;25154;81772;102555453;24533;50559;192213;81718;170897;83799;117596;29637;81743;29427;113898;170496;288242;24451;24479;368066;25060;116720;50592;84403;306071;288589;191575;25557;306283;299106;29366;100360977;685232;24392;24599;24212;24383;83516;3…	Msr1;Lipe;Nnmt;Pcp4;Slc7a5;Hk2;Gna15;Cdca3;Ntrk2;Thy1;Gsn;Prdx1;LOC100360781;Eno1;Rgs7;Ccl3;Bcat1;Il1a;Myo5a;Aox1;Ctsh;Ptpn7;Mvd;Aldh3a1;Pgr;Rps9;LOC102555453;Ldha;Acot1;Rasgrf1;Cdo1;Sphk1;Dpp7;Atp6v1b2;Hmgcs1;Pde2a;Aif1;Prdx5;Lcn2;Chaf1b;Hmox1;Idh1;Inmt;Hk3;Pik3c2g;Gria1;Gjb6;Lcp1;Rasa4;Nme1;Star;Anxa8;Rpl10l;Serpine2;LOC100360977;Atp6v1a;Gja1;Nos2;Atp1a2;Gapdh;Ppargc1a;Xcr1;Lbp;Sult1a1;Slc2a1;G…
GO:0030175	filopodium	3	63	0.808928	1	306071;316521;25017	Lcp1;Vil1;Myo5a
GO:0031965	nuclear membrane	9	167	0.81033	1	361422;50672;406864;29244;114097;297339;64191;84396;171411	Cotl1;Ednrb;Clic1;Gch1;Ltc4s;Capg;Dhcr7;Atp1b4;Tmem176b
GO:0031674	I band	5	99	0.810644	1	309760;363091;140939;316330;311167	Mypn;Myzap;Trim63;Ankrd23;Smtnl1
GO:0030131	clathrin adaptor complex	1	24	0.812438	1	65046	Ap2s1
GO:0033116	endoplasmic reticulum-Golgi intermediate compartment membrane	1	24	0.812438	1	192129	Vmp1
GO:0046930	pore complex	2	45	0.817053	1	117512;24237	C9;C6
GO:0019867	outer membrane	7	135	0.819481	1	24392;25059;114097;64191;79223;29221;498840	Gja1;Hk2;Ltc4s;Dhcr7;Gk;Arg1;Tmem173
GO:0005765	lysosomal membrane	9	169	0.820376	1	293650;303801;294269;65161;117596;29186;266714;685232;25686	Tcirg1;Lamp3;RT1-Da;Litaf;Atp6v1b2;Cd63;Myo7a;Atp6v1a;Gnai1
GO:0005844	polysome	1	25	0.824583	1	299106	Rpl10l
GO:0032281	alpha-amino-3-hydroxy-5-methyl-4-isoxazolepropionic acid selective glutamate receptor complex	1	25	0.824583	1	50592	Gria1
GO:0043198	dendritic shaft	2	46	0.826115	1	362235;50592	Syndig1;Gria1
GO:0008328	ionotropic glutamate receptor complex	2	46	0.826115	1	191573;50592	Grin3a;Gria1
GO:0044437	vacuolar part	11	204	0.827957	1	293650;117596;294269;65161;303801;192129;297932;29186;266714;685232;25686	Tcirg1;Atp6v1b2;RT1-Da;Litaf;Lamp3;Vmp1;Atp6v0d2;Cd63;Myo7a;Atp6v1a;Gnai1
GO:0072372	primary cilium	5	102	0.829545	1	266714;360034;25017;365901;83567	Myo7a;Myrip;Myo5a;Gnat2;Mchr1
GO:0005938	cell cortex	9	172	0.834674	1	360034;363091;299339;25544;24366;24367;362510;24778;282838	Myrip;Myzap;Tnfaip2;Sele;Fgb;Fgg;Melk;Slc2a1;Gm2a
GO:0071944	cell periphery	250	3840	0.835443	1	29597;317676;293650;499342;363091;293154;29599;24498;679975;308761;246138;361232;315215;316077;24493;684984;245920;50719;360492;24392;353250;29465;246118;315298;24251;315611;300027;29610;83731;85266;29290;311374;171099;500906;360034;78960;89804;293591;24904;89788;191573;65161;288589;362510;191575;25349;24383;60566;298504;304477;60350;286894;54289;83620;50676;293186;25054;50672;50671;25544;298857;…	P2ry2;Lat2;Tcirg1;Cd274;Myzap;Folr2;Atp2b3;Il6;Gpr183;Prc1;Ly6i;Pak1ip1;Mlc1;Entpd3;Il1a;Cd300lg;Cxcl10;Slc7a5;Hn1l;Gja1;Niacr1;Trpv2;Tubb3;Racgap1;Cd53;Scn4b;Gpihbp1;Tgfbr3;Kcnma1;Prss12;Adora1;Duoxa1;Rasd2;Cyth4;Myrip;Prx;Tek;Cd163l1;Slc22a1;Gna15;Grin3a;Litaf;Rasa4;Melk;Nme1;Scn2b;Gapdh;Syt8;Mfsd2a;Kntc1;Cd14;Parm1;Rgs1;Cit;Slc6a12;Lyve1;Ntrk2;Ednrb;Fasn;Sele;Gpr113;Cd300lf;Cspg5;P2ry6;Efnb2;R…
GO:0008180	COP9 signalosome	1	26	0.835942	1	81511	Lat
GO:0048475	coated membrane	3	67	0.839327	1	29571;65046;65178	Scn10a;Ap2s1;Snap91
GO:0030117	membrane coat	3	67	0.839327	1	29571;65046;65178	Scn10a;Ap2s1;Snap91
GO:0031970	organelle envelope lumen	3	67	0.839327	1	25557;59103;100363502	Star;Ptges;LOC100363502
GO:0030027	lamellipodium	5	106	0.852323	1	29427;316521;84510;81651;296654	Aif1;Vil1;Stmn2;Cspg4;Gsn
GO:0000139	Golgi membrane	16	294	0.855821	1	288617;24392;83627;25086;25054;171394;24891;313339;295934;65171;316583;50568;307859;286894;65046;84491	Tpst1;Gja1;Galnt5;Cyp2e1;Ntrk2;Clstn2;Abcb4;Acer2;Chst1;Scamp5;B3gnt7;Cspg5;Chst5;Parm1;Ap2s1;Qsox1
GO:0044304	main axon	2	50	0.858444	1	29290;29213	Adora1;Tubb4a
GO:0044449	contractile fiber part	7	143	0.859383	1	308709;363091;311167;140939;309760;29437;316330	Synm;Myzap;Smtnl1;Trim63;Mypn;Acta1;Ankrd23
GO:0017053	transcriptional repressor complex	2	51	0.865618	1	295538;155430	Depdc1;Hey2
GO:0009898	cytoplasmic side of plasma membrane	2	51	0.865618	1	246781;282838	Ptpn7;Gm2a
GO:0043596	nuclear replication fork	1	29	0.865794	1	313108	Mms22l
GO:0044433	cytoplasmic vesicle part	13	248	0.868336	1	360034;170568;365377;24392;303801;25651;50568;29242;116649;65046;65171;29186;26989	Myrip;Dmbt1;Trim72;Gja1;Lamp3;Selp;Cspg5;Car4;Kcnj4;Ap2s1;Scamp5;Cd63;Cadps
GO:0015934	large ribosomal subunit	3	72	0.871363	1	100360781;299106;102555453	LOC100360781;Rpl10l;LOC102555453
GO:0042995	cell projection	79	1293	0.872934	1	114203;171049;25728;25154;287526;25054;24832;25415;296654;684516;24213;24333;54296;25589;25364;294043;80900;24310;306071;259243;170897;298340;29465;246118;24890;29440;79129;192213;64160;192211;24770;117596;298692;58814;81743;83731;85266;29290;25425;83567;365901;25017;360034;78960;89804;84510;50592;191573;311546;24848;24807;116649;191575;24950;25557;117558;25553;29427;29221;685232;362415;83620;242…	Sh2b2;Folr1;Apoe;Pgr;Serpinf1;Ntrk2;Thy1;Crmp1;Gsn;Kcnc4;Atp1a3;Eno1;Rgs7;Kdr;Asic2;Sorcs3;Slco1a5;Ace;Lcp1;Kcnip4;Sphk1;Slc6a14;Trpv2;Tubb3;Esr1;Slc26a4;Cyba;Rasgrf1;Basp1;Prom2;Ccl2;Atp6v1b2;Ttll10;Tmod2;Pde2a;Kcnma1;Prss12;Adora1;Ctsh;Mchr1;Gnat2;Myo5a;Myrip;Prx;Tek;Stmn2;Gria1;Grin3a;Tpx2;Tph1;Tacr1;Kcnj4;Nme1;Srd5a1;Star;Mylk2;Slc6a4;Aif1;Arg1;Atp6v1a;Ttll3;Cit;Atp1a2;Scimp;Fzd8;Aldoc;Scn10a…
GO:0030119	AP-type membrane coat adaptor complex	1	30	0.874484	1	65046	Ap2s1
GO:0005637	nuclear inner membrane	1	30	0.874484	1	84396	Atp1b4
GO:0043292	contractile fiber	8	165	0.877731	1	308709;363091;24392;311167;140939;309760;29437;316330	Synm;Myzap;Gja1;Smtnl1;Trim63;Mypn;Acta1;Ankrd23
GO:0005741	mitochondrial outer membrane	5	112	0.88169	1	29221;498840;79223;25059;24392	Arg1;Tmem173;Gk;Hk2;Gja1
GO:0032838	cell projection cytoplasm	3	74	0.882507	1	298692;362415;25425	Ttll10;Ttll3;Ctsh
GO:0098573	intrinsic component of mitochondrial membrane	1	31	0.882612	1	64625	Bid
GO:0030120	vesicle coat	1	31	0.882612	1	65046	Ap2s1
GO:0032592	integral component of mitochondrial membrane	1	31	0.882612	1	64625	Bid
GO:0045111	intermediate filament cytoskeleton	6	131	0.884471	1	308709;24392;191575;363198;315318;25017	Synm;Gja1;Nme1;Cenpq;Krt80;Myo5a
GO:0005759	mitochondrial matrix	9	186	0.889956	1	287633;89813;117099;117254;24787;83791;81743;361993;497672	Lrrc59;Pdk4;Bdh1;Prdx1;Sod2;Fdps;Pde2a;Them5;Brca1
GO:0005793	endoplasmic reticulum-Golgi intermediate compartment	2	56	0.896717	1	192129;29242	Vmp1;Car4
GO:0000118	histone deacetylase complex	1	33	0.897323	1	155430	Hey2
GO:0031227	intrinsic component of endoplasmic reticulum membrane	3	77	0.897609	1	25086;170635;246074	Cyp2e1;Dhrs9;Scd1
GO:0097223	sperm part	5	117	0.902201	1	291597;25425;60566;364018;311327	Trim36;Ctsh;Syt8;Ncf2;Casc5
GO:0030017	sarcomere	6	136	0.903317	1	363091;311167;140939;309760;29437;316330	Myzap;Smtnl1;Trim63;Mypn;Acta1;Ankrd23
GO:0005776	autophagic vacuole	1	34	0.903971	1	192129	Vmp1
GO:0005758	mitochondrial intermembrane space	2	58	0.907166	1	25557;100363502	Star;LOC100363502
GO:0098562	cytoplasmic side of membrane	2	58	0.907166	1	246781;282838	Ptpn7;Gm2a
GO:0030016	myofibril	7	156	0.908635	1	308709;363091;311167;140939;309760;29437;316330	Synm;Myzap;Smtnl1;Trim63;Mypn;Acta1;Ankrd23
GO:0008023	transcription elongation factor complex	1	35	0.91019	1	313108	Mms22l
GO:0000781	chromosome, telomeric region	1	35	0.91019	1	500987	H2afx
GO:0016605	PML body	2	59	0.912012	1	83516;499870	Ppargc1a;Rad51
GO:1990204	oxidoreductase complex	3	81	0.915019	1	302976;79129;66021	Noxo1;Cyba;Cybb
GO:0044798	nuclear transcription factor complex	2	60	0.916619	1	140586;311723	Sox9;Sox18
GO:0098588	bounding membrane of organelle	78	1316	0.920188	1	266758;170568;287450;24891;293650;25059;303801;170899;288617;25054;29230;171394;83792;246074;192129;316583;307859;25427;317170;306283;114097;361527;24392;286896;25686;65046;192211;192249;313339;117596;295934;24299;54246;83731;288504;311374;83567;24451;84491;360034;84493;50592;79223;294269;170635;65161;25651;25046;24950;170824;25256;64191;24886;297932;29186;29221;685232;140910;286894;266684;113976…	Sec11c;Dmbt1;Slc16a11;Abcb4;Tcirg1;Hk2;Lamp3;Kcnk2;Tpst1;Ntrk2;Sqle;Clstn2;Scd;Scd1;Vmp1;B3gnt7;Chst5;Cyp51;Slc9a7;Anxa8;Ltc4s;Pld3;Gja1;Sgpl1;Gnai1;Ap2s1;Prom2;Ehd3;Acer2;Atp6v1b2;Chst1;Cyp2a3;Cyp2f4;Kcnma1;Snx8;Duoxa1;Mchr1;Hmox1;Qsox1;Myrip;Fmo3;Gria1;Gk;RT1-Da;Dhrs9;Litaf;Selp;Pigr;Srd5a1;Steap3;Fmo1;Dhcr7;Tbxas1;Atp6v0d2;Cd63;Arg1;Atp6v1a;Msmo1;Parm1;Cyp2d1;Acsl4;RGD1307443;Fmo2;Galnt5;Cyp4a…
GO:0005794	Golgi apparatus	50	876	0.921945	1	361308;25728;25054;79431;29599;364754;116720;316583;688090;24890;499302;317170;84012;24392;24464;307859;79129;295934;24891;313339;25017;306748;81743;50568;296846;84491;501854;84510;304334;65161;171394;306009;288617;498840;65046;286894;83620;360621;50671;24213;25086;83627;29242;290638;24648;65199;65171;66021;25589;29393	Kif20a;Apoe;Ntrk2;Bhlhe40;Atp2b3;Fzd8;Pik3c2g;B3gnt7;RT1-Bb;Esr1;Gal3st3;Slc9a7;Slc1a6;Gja1;Hp;Chst5;Cyba;Chst1;Abcb4;Acer2;Myo5a;Cxcl14;Pde2a;Cspg5;Hepacam2;Qsox1;Rab7b;Stmn2;Fam20c;Litaf;Clstn2;Slc39a14;Tpst1;Tmem173;Ap2s1;Parm1;Cit;Cdc6;Fasn;Atp1a3;Cyp2e1;Galnt5;Car4;B3gnt3;Serpina1;Kcnip3;Scamp5;Cybb;Kdr;Col1a1
GO:0000932	cytoplasmic mRNA processing body	1	38	0.926531	1	310395	Ccr4
GO:0031461	cullin-RING ubiquitin ligase complex	3	86	0.932972	1	117524;64515;296368	Ccnf;Cdc20;Ube2c
GO:0030018	Z disc	3	89	0.941992	1	309760;363091;140939	Mypn;Myzap;Trim63
GO:0005802	trans-Golgi network	4	114	0.951471	1	501854;29242;65171;317170	Rab7b;Car4;Scamp5;Slc9a7
GO:0030176	integral component of endoplasmic reticulum membrane	2	70	0.951726	1	170635;246074	Dhrs9;Scd1
GO:0022626	cytosolic ribosome	4	117	0.957598	1	100360781;299106;81772;102555453	LOC100360781;Rpl10l;Rps9;LOC102555453
GO:0000151	ubiquitin ligase complex	5	139	0.959871	1	117524;497672;64515;64557;296368	Ccnf;Brca1;Cdc20;Bard1;Ube2c
GO:1902554	serine/threonine protein kinase complex	1	48	0.962386	1	301518	Prkag3
GO:0030662	coated vesicle membrane	1	50	0.967099	1	65046	Ap2s1
GO:0044441	ciliary part	6	169	0.973061	1	24533;362415;192211;298692;83567;25425	Ldha;Ttll3;Prom2;Ttll10;Mchr1;Ctsh
GO:0005730	nucleolus	27	553	0.973679	1	64557;79431;117254;297339;361232;501015;364018;50719;360559;102555453;266813;310344;363198;24451;360243;25308;24883;311336;307126;25515;500545;259235;680531;294388;309523;499870;308100	Bard1;Bhlhe40;Prdx1;Capg;Pak1ip1;C2cd4b;Ncf2;Slc7a5;Fam64a;LOC102555453;Prrx1;Plk4;Cenpq;Hmox1;Top2a;Cstb;Wt1;Nusap1;Mcm10;Plk1;Cdca8;Sdr9c7;Sapcd2;Stox1;Kif20b;Rad51;Acat2
GO:0031300	intrinsic component of organelle membrane	6	171	0.975193	1	25086;170635;313339;246074;64625;84491	Cyp2e1;Dhrs9;Acer2;Scd1;Bid;Qsox1
GO:0044431	Golgi apparatus part	20	434	0.975814	1	83620;501854;288617;24392;50568;83627;25086;25054;29242;171394;24891;313339;295934;65171;316583;317170;307859;286894;65046;84491	Cit;Rab7b;Tpst1;Gja1;Cspg5;Galnt5;Cyp2e1;Ntrk2;Car4;Clstn2;Abcb4;Acer2;Chst1;Scamp5;B3gnt7;Slc9a7;Chst5;Parm1;Ap2s1;Qsox1
GO:0045095	keratin filament	1	55	0.976459	1	315318	Krt80
GO:0030672	synaptic vesicle membrane	1	55	0.976459	1	65171	Scamp5
GO:0016607	nuclear speck	3	111	0.980723	1	24883;64160;360161	Wt1;Basp1;Nek6
GO:0022627	cytosolic small ribosomal subunit	1	58	0.980742	1	81772	Rps9
GO:0000502	proteasome complex	1	60	0.983156	1	360772	Zfand2a
GO:0005746	mitochondrial respiratory chain	1	61	0.984246	1	100363502	LOC100363502
GO:0031090	organelle membrane	101	1803	0.985221	1	288617;293650;89813;298282;117099;317170;361422;286894;286896;295934;83731;84493;84491;360034;65161;24787;266684;311374;50672;83627;83781;50568;288026;266758;406864;170899;25054;83792;246074;316583;25686;29230;361527;25427;288504;365377;50592;294269;25046;170824;298606;64191;24886;29221;26989;246245;362235;65171;116831;170568;303801;84396;24950;24891;306283;25059;192211;313339;24299;113976;83567;…	Tpst1;Tcirg1;Pdk4;Oma1;Bdh1;Slc9a7;Cotl1;Parm1;Sgpl1;Chst1;Kcnma1;Fmo3;Qsox1;Myrip;Litaf;Sod2;Cyp2d1;Duoxa1;Ednrb;Galnt5;Lgals3;Cspg5;Atp13a4;Sec11c;Clic1;Kcnk2;Ntrk2;Scd;Scd1;B3gnt7;Gnai1;Sqle;Pld3;Cyp51;Snx8;Trim72;Gria1;RT1-Da;Pigr;Steap3;Slc25a34;Dhcr7;Tbxas1;Arg1;Cadps;Fmo2;Syndig1;Scamp5;Fxyd3;Dmbt1;Lamp3;Atp1b4;Srd5a1;Abcb4;Anxa8;Hk2;Prom2;Acer2;Cyp2a3;Acsl4;Mchr1;Hmox1;RGD1307443;Selp;Msm…
GO:0031301	integral component of organelle membrane	5	162	0.98535	1	313339;64625;246074;170635;84491	Acer2;Bid;Scd1;Dhrs9;Qsox1
GO:0005929	cilium	11	285	0.985731	1	360034;24533;83567;29213;192211;362415;298692;266714;25017;365901;25425	Myrip;Ldha;Mchr1;Tubb4a;Prom2;Ttll3;Ttll10;Myo7a;Myo5a;Gnat2;Ctsh
GO:1902911	protein kinase complex	1	64	0.987113	1	301518	Prkag3
GO:0030136	clathrin-coated vesicle	1	65	0.987948	1	65046	Ap2s1
GO:0043227	membrane-bounded organelle	513	8194	0.988324	1	684984;313840;689399;362619;29213;361232;81819;286894;286896;361623;296368;497009;54264;25060;360243;117558;292935;54282;60350;311374;83620;83627;29455;259235;29452;100365043;292301;292306;309304;25524;304951;64515;298068;117254;364754;117524;25448;50592;365298;117258;24571;290562;691857;24375;100910554;117099;288504;289997;365377;50719;89824;140939;171569;24883;64191;24886;100360977;307106;69199…	Cd300lg;Rmdn2;Cenpw;Smpdl3b;Tubb4a;Pak1ip1;Pax8;Parm1;Sgpl1;Trim66;Ube2c;Naaa;Mafb;Hk3;Top2a;Mylk2;Htatip2;Padi1;Cd14;Duoxa1;Cit;Galnt5;Gdf15;Sdr9c7;Epas1;LOC100365043;T;Rnaset2;Pdcd1lg2;Psap;Nuf2;Cdc20;Sec61b;Prdx1;Fzd8;Ccnf;Cenpi;Gria1;Alpk3;Cntn1;Muc1;Sema3g;Pygo1;Fuca1;LOC100910554;Bdh1;Snx8;Dlgap5;Trim72;Slc7a5;Chi3l1;Trim63;Spon2;Wt1;Dhcr7;Tbxas1;LOC100360977;Sfmbt2;Gp1ba;Ubd;Txndc5;Rrm2;Gr…
GO:0016363	nuclear matrix	1	66	0.988728	1	316129	Uhrf1
GO:0031985	Golgi cisterna	1	66	0.988728	1	83620	Cit
GO:0044446	intracellular organelle part	269	4475	0.989959	1	288617;81819;293650;89813;298282;306970;311723;79431;689399;29213;308761;296846;361232;294043;361993;310678;100912290;317170;81726;361422;24392;360559;286896;246118;361623;292935;296368;502125;295934;499933;363198;83731;29290;311374;502129;311336;84491;360034;54227;89804;313840;360243;298850;191573;65161;291100;291145;191575;24950;24787;307126;289054;100360950;286894;266684;25515;83620;50672;2892…	Tpst1;Pax8;Tcirg1;Pdk4;Oma1;Hist1h2an;Sox18;Bhlhe40;Cenpw;Tubb4a;Prc1;Hepacam2;Pak1ip1;Sorcs3;Them5;Hist2h3c2;LOC100912290;Slc9a7;Mvd;Cotl1;Gja1;Fam64a;Sgpl1;Tubb3;Trim66;Htatip2;Ube2c;Hist1h2ah;Chst1;Dsn1;Cenpq;Kcnma1;Adora1;Duoxa1;Hist1h2ai;Nusap1;Qsox1;Myrip;Arpc1b;Tek;Rmdn2;Top2a;Cenpa;Grin3a;Litaf;Irf4;Hist1h1a;Nme1;Srd5a1;Sod2;Mcm10;Aspm;LOC100360950;Parm1;Cyp2d1;Plk1;Cit;Ednrb;Vangl2;Galnt…
GO:0031984	organelle subcompartment	1	68	0.990141	1	83620	Cit
GO:0044391	ribosomal subunit	4	148	0.990215	1	100360781;299106;81772;102555453	LOC100360781;Rpl10l;Rps9;LOC102555453
GO:0032991	macromolecular complex	218	3687	0.990513	1	361308;293650;361923;313840;689399;24498;688730;54296;25503;100912290;304477;24392;246118;315298;296368;502125;289185;29610;83731;29292;54264;502129;311336;360034;89804;360243;58966;191573;291100;191575;363227;25453;29200;24383;311723;289054;100360950;60350;24773;25515;89788;25448;79217;291159;29687;83781;29213;302976;306962;24464;691488;100365043;294286;292301;29452;313108;114203;362634;316129;4…	Kif20a;Tcirg1;Rpl22l1;Rmdn2;Cenpw;Il6;Gpr84;Rgs7;Ocm2;LOC100912290;Kntc1;Gja1;Tubb3;Racgap1;Ube2c;Hist1h2ah;Creg1;Tgfbr3;Kcnma1;Ftl1;Mafb;Hist1h2ai;Nusap1;Myrip;Tek;Top2a;Ramp2;Grin3a;Irf4;Nme1;Nabp1;Gdnf;Inhba;Gapdh;Sox18;Aspm;LOC100360950;Cd14;Sftpa1;Plk1;Gna15;Cenpi;Gja3;Hist1h2ail;C1qb;Lgals3;Tubb4a;Noxo1;Hist1h2ac;Hp;Hist3h2bb;LOC100365043;Kifc1;T;Epas1;Mms22l;Sh2b2;C1qc;Uhrf1;Clic1;Kcnk2;Nt…
GO:0044455	mitochondrial membrane part	4	149	0.990685	1	25557;64625;100363502;113976	Star;Bid;LOC100363502;Acsl4
GO:0044422	organelle part	278	4628	0.991221	1	288617;81819;293650;89813;298282;306970;311723;79431;689399;29213;308761;296846;361232;294043;361993;310678;100912290;317170;81726;361422;24392;360559;286896;246118;361623;292935;296368;502125;295934;499933;680097;363198;83731;29290;311374;502129;311336;84491;360034;54227;89804;313840;360243;298850;191573;65161;291100;291145;191575;24950;24787;307126;289054;100360950;286894;266684;25515;83620;506…	Tpst1;Pax8;Tcirg1;Pdk4;Oma1;Hist1h2an;Sox18;Bhlhe40;Cenpw;Tubb4a;Prc1;Hepacam2;Pak1ip1;Sorcs3;Them5;Hist2h3c2;LOC100912290;Slc9a7;Mvd;Cotl1;Gja1;Fam64a;Sgpl1;Tubb3;Trim66;Htatip2;Ube2c;Hist1h2ah;Chst1;Dsn1;LOC680097;Cenpq;Kcnma1;Adora1;Duoxa1;Hist1h2ai;Nusap1;Qsox1;Myrip;Arpc1b;Tek;Rmdn2;Top2a;Cenpa;Grin3a;Litaf;Irf4;Hist1h1a;Nme1;Srd5a1;Sod2;Mcm10;Aspm;LOC100360950;Parm1;Cyp2d1;Plk1;Cit;Ednrb;Va…
GO:0070469	respiratory chain	1	70	0.991376	1	100363502	LOC100363502
GO:0031967	organelle envelope	34	723	0.991815	1	25728;25059;298282;297339;192211;59103;361422;24392;690745;406864;117099;113976;498840;116720;308099;89813;292935;298606;24787;64191;84396;29221;287442;287633;50672;25557;29244;114097;362720;100363502;79223;64625;83781;171411	Apoe;Hk2;Oma1;Capg;Prom2;Ptges;Cotl1;Gja1;Marc1;Clic1;Bdh1;Acsl4;Tmem173;Pik3c2g;Fndc1;Pdk4;Htatip2;Slc25a34;Sod2;Dhcr7;Atp1b4;Arg1;Tmem256;Lrrc59;Ednrb;Star;Gch1;Ltc4s;Rrm2;LOC100363502;Gk;Bid;Lgals3;Tmem176b
GO:0044444	cytoplasmic part	308	5100	0.991849	1	24191;29597;288617;29592;293650;89813;89788;298282;361923;313840;79431;60566;29599;54296;296846;296138;315215;24493;299339;84012;81726;24392;50568;29465;311167;50559;306748;29692;81869;295934;29610;362474;497009;85266;29290;25256;84493;84491;365042;246781;25060;360243;252929;65161;117558;288589;362510;191575;24950;24787;24770;25510;292848;286894;266684;311374;83620;117038;24383;300218;50671;25544…	Aldoc;P2ry2;Tpst1;Bcat1;Tcirg1;Pdk4;Gna15;Oma1;Rpl22l1;Rmdn2;Bhlhe40;Syt8;Atp2b3;Rgs7;Hepacam2;Acoxl;Mlc1;Il1a;Tnfaip2;Slc1a6;Mvd;Gja1;Cspg5;Trpv2;Smtnl1;Acot1;Cxcl14;Pla2g2a;Gstm7;Chst1;Tgfbr3;Adhfe1;Naaa;Prss12;Adora1;Fmo1;Fmo3;Qsox1;Rab32;Ptpn7;Hk3;Top2a;Ctsz;Litaf;Mylk2;Rasa4;Melk;Nme1;Srd5a1;Sod2;Ccl2;Pcp4;Klk13;Parm1;Cyp2d1;Duoxa1;Cit;Mt3;Gapdh;Tuba1c;Fasn;Sele;Sult1a1;Kifc1;Lgals3;Them5;Id…
GO:0031975	envelope	34	726	0.992396	1	25728;25059;298282;297339;192211;59103;361422;24392;690745;406864;117099;113976;498840;116720;308099;89813;292935;298606;24787;64191;84396;29221;287442;287633;50672;25557;29244;114097;362720;100363502;79223;64625;83781;171411	Apoe;Hk2;Oma1;Capg;Prom2;Ptges;Cotl1;Gja1;Marc1;Clic1;Bdh1;Acsl4;Tmem173;Pik3c2g;Fndc1;Pdk4;Htatip2;Slc25a34;Sod2;Dhcr7;Atp1b4;Arg1;Tmem256;Lrrc59;Ednrb;Star;Gch1;Ltc4s;Rrm2;LOC100363502;Gk;Bid;Lgals3;Tmem176b
GO:0030135	coated vesicle	2	106	0.99386	1	65046;289229	Ap2s1;Vangl2
GO:0005667	transcription factor complex	6	206	0.994558	1	29452;314818;140586;289185;311723;54264	Epas1;E2f7;Sox9;Creg1;Sox18;Mafb
GO:0015935	small ribosomal subunit	1	77	0.994603	1	81772	Rps9
GO:0034399	nuclear periphery	1	78	0.994952	1	316129	Uhrf1
GO:0044445	cytosolic part	6	208	0.995029	1	116720;102555453;100360781;24333;299106;81772	Pik3c2g;LOC102555453;LOC100360781;Eno1;Rpl10l;Rps9
GO:0031966	mitochondrial membrane	18	455	0.995679	1	287442;24392;25059;298606;308099;89813;690745;117099;25557;24787;100363502;79223;298282;29221;64625;498840;83781;113976	Tmem256;Gja1;Hk2;Slc25a34;Fndc1;Pdk4;Marc1;Bdh1;Star;Sod2;LOC100363502;Gk;Oma1;Arg1;Bid;Tmem173;Lgals3;Acsl4
GO:0031224	intrinsic component of membrane	250	4261	0.995791	1	29597;288617;64576;499342;298282;313840;317676;293154;29599;24498;679975;688730;365360;315215;294043;58949;24310;84012;50719;24392;353250;29465;29695;24251;315611;295934;29610;83731;29290;84493;84491;289235;89804;25339;301066;58966;314386;191573;287885;287466;299242;25349;60566;298504;60350;286894;311374;50676;79217;297801;50672;289229;25544;498289;298857;287818;298943;117264;288026;25589;266758;…	P2ry2;Tpst1;Ptprv;Cd274;Oma1;Rmdn2;Lat2;Folr2;Atp2b3;Il6;Gpr183;Gpr84;Tmc5;Mlc1;Sorcs3;Ptafr;Ace;Slc1a6;Slc7a5;Gja1;Niacr1;Trpv2;Gabrr2;Cd53;Scn4b;Chst1;Tgfbr3;Kcnma1;Adora1;Fmo3;Qsox1;Slamf9;Tek;Npr3;Ccr8;Ramp2;Gpr68;Grin3a;Sectm1a;Wscd1;Gpr65;Scn2b;Syt8;Mfsd2a;Cd14;Parm1;Duoxa1;Slc6a12;Gja3;Xkr4;Ednrb;Vangl2;Sele;Opn3;Gpr113;Cd300lf;Bcap29;P2ry6;Atp13a4;Kdr;Sec11c;Ackr4;Tacr1;Chrng;Clic1;Evi2a;…
GO:0005923	tight junction	1	82	0.996138	1	290485	Cldn10
GO:0070160	occluding junction	1	82	0.996138	1	290485	Cldn10
GO:0016020	membrane	423	6968	0.996553	1	684984;313840;679975;287610;361232;294043;297801;360711;286894;286896;315611;500906;301066;292935;25349;298504;60350;25694;311374;83620;361537;83627;498289;298857;83781;311170;306636;304951;24832;298068;364754;117257;50592;117258;24571;290562;56765;100124593;117099;24904;288504;64357;63848;365377;294269;63843;64191;24886;100360977;689790;289235;691992;691993;365183;171049;499264;170568;363091;302…	Cd300lg;Rmdn2;Gpr183;Lpo;Pak1ip1;Sorcs3;Xkr4;RGD1310335;Parm1;Sgpl1;Scn4b;Cyth4;Ccr8;Htatip2;Scn2b;Mfsd2a;Cd14;Has2;Duoxa1;Cit;Tyrobp;Galnt5;Opn3;Gpr113;Lgals3;Slc43a3;Efnb2;Nuf2;Thy1;Sec61b;Fzd8;Gpr176;Gria1;Cntn1;Muc1;Sema3g;Plvap;Cxcr6;Bdh1;Slc22a1;Snx8;Cd200r1;Fxyd7;Trim72;RT1-Da;P2ry4;Dhcr7;Tbxas1;LOC100360977;Clec2dl1;Slamf9;Gp1ba;Scimp;Fcar;Folr1;Apobr;Dmbt1;Myzap;Noxo1;Slc16a11;Pla2g2a;Cd…
GO:0043226	organelle	550	8947	0.99728	1	684984;313840;689399;362619;29213;361232;81819;294043;286894;286896;361623;296368;497009;54264;25060;360243;117558;292935;54282;60350;311374;83620;83627;29455;259235;29452;100365043;292301;292306;309304;25524;29242;64515;298068;117254;100360781;117524;25448;50592;365298;117258;24571;290562;691857;24375;100910554;117099;288504;289997;365377;50719;89824;140939;171569;24883;64191;24886;100360977;307…	Cd300lg;Rmdn2;Cenpw;Smpdl3b;Tubb4a;Pak1ip1;Pax8;Sorcs3;Parm1;Sgpl1;Trim66;Ube2c;Naaa;Mafb;Hk3;Top2a;Mylk2;Htatip2;Padi1;Cd14;Duoxa1;Cit;Galnt5;Gdf15;Sdr9c7;Epas1;LOC100365043;T;Rnaset2;Pdcd1lg2;Psap;Car4;Cdc20;Sec61b;Prdx1;LOC100360781;Ccnf;Cenpi;Gria1;Alpk3;Cntn1;Muc1;Sema3g;Pygo1;Fuca1;LOC100910554;Bdh1;Snx8;Dlgap5;Trim72;Slc7a5;Chi3l1;Trim63;Spon2;Wt1;Dhcr7;Tbxas1;LOC100360977;Sfmbt2;Gp1ba;Ubd…
GO:0005743	mitochondrial inner membrane	10	312	0.997627	1	287442;89813;298606;298282;83781;690745;117099;25557;24787;100363502	Tmem256;Pdk4;Slc25a34;Oma1;Lgals3;Marc1;Bdh1;Star;Sod2;LOC100363502
GO:0005795	Golgi stack	1	90	0.99774	1	83620	Cit
GO:0044425	membrane part	301	5118	0.997781	1	29597;288617;64576;499342;298282;313840;25330;293154;29599;24498;679975;688730;54296;315215;294043;58949;293650;245920;50719;24392;353250;29465;29695;315298;24251;315611;295934;29610;83731;365360;29290;287129;84493;84491;360034;289235;89804;25339;301066;24904;314386;191573;363091;287885;287466;191575;25349;60566;298504;60350;286894;266684;311374;50676;79217;297801;50672;289229;25544;498289;298857…	P2ry2;Tpst1;Ptprv;Cd274;Oma1;Rmdn2;Lipe;Folr2;Atp2b3;Il6;Gpr183;Gpr84;Rgs7;Mlc1;Sorcs3;Ptafr;Tcirg1;Cxcl10;Slc7a5;Gja1;Niacr1;Trpv2;Gabrr2;Racgap1;Cd53;Scn4b;Chst1;Tgfbr3;Kcnma1;Tmc5;Adora1;Tmem204;Fmo3;Qsox1;Myrip;Slamf9;Tek;Npr3;Ccr8;Slc22a1;Gpr68;Grin3a;Myzap;Sectm1a;Wscd1;Nme1;Scn2b;Syt8;Mfsd2a;Cd14;Parm1;Cyp2d1;Duoxa1;Slc6a12;Gja3;Xkr4;Ednrb;Vangl2;Sele;Opn3;Gpr113;Cd300lf;Bcap29;P2ry6;Alox1…
GO:0043296	apical junction complex	1	93	0.998151	1	290485	Cldn10
GO:0036464	cytoplasmic ribonucleoprotein granule	1	94	0.998271	1	310395	Ccr4
GO:0019866	organelle inner membrane	11	342	0.998341	1	287442;89813;298606;298282;83781;690745;117099;25557;24787;100363502;84396	Tmem256;Pdk4;Slc25a34;Oma1;Lgals3;Marc1;Bdh1;Star;Sod2;LOC100363502;Atp1b4
GO:0035770	ribonucleoprotein granule	1	95	0.998383	1	310395	Ccr4
GO:0005740	mitochondrial envelope	18	487	0.998519	1	287442;24392;25059;298606;308099;89813;690745;117099;25557;24787;100363502;79223;298282;29221;64625;498840;83781;113976	Tmem256;Gja1;Hk2;Slc25a34;Fndc1;Pdk4;Marc1;Bdh1;Star;Sod2;LOC100363502;Gk;Oma1;Arg1;Bid;Tmem173;Lgals3;Acsl4
GO:0016021	integral component of membrane	239	4179	0.998582	1	29597;288617;64576;499342;298282;313840;317676;60566;29599;24498;679975;688730;365360;315215;294043;58949;24310;84012;50719;24392;353250;29465;29695;24251;315611;295934;29610;83731;29290;84493;84491;289235;89804;25339;301066;58966;314386;191573;287885;287466;299242;25349;287472;298504;60350;286894;311374;50676;79217;297801;50672;289229;25544;498289;298857;287818;298943;117264;288026;25589;266758;…	P2ry2;Tpst1;Ptprv;Cd274;Oma1;Rmdn2;Lat2;Syt8;Atp2b3;Il6;Gpr183;Gpr84;Tmc5;Mlc1;Sorcs3;Ptafr;Ace;Slc1a6;Slc7a5;Gja1;Niacr1;Trpv2;Gabrr2;Cd53;Scn4b;Chst1;Tgfbr3;Kcnma1;Adora1;Fmo3;Qsox1;Slamf9;Tek;Npr3;Ccr8;Ramp2;Gpr68;Grin3a;Sectm1a;Wscd1;Gpr65;Scn2b;Tlcd1;Mfsd2a;Cd14;Parm1;Duoxa1;Slc6a12;Gja3;Xkr4;Ednrb;Vangl2;Sele;Opn3;Gpr113;Cd300lf;Bcap29;P2ry6;Atp13a4;Kdr;Sec11c;Ackr4;Tacr1;Chrng;Clic1;Evi2a;…
GO:0044429	mitochondrial part	24	608	0.998744	1	25059;298282;117254;497672;83791;117099;89813;690745;361993;81743;113976;498840;287442;308099;298606;24787;29221;287633;25557;83781;100363502;79223;64625;24392	Hk2;Oma1;Prdx1;Brca1;Fdps;Bdh1;Pdk4;Marc1;Them5;Pde2a;Acsl4;Tmem173;Tmem256;Fndc1;Slc25a34;Sod2;Arg1;Lrrc59;Star;Lgals3;LOC100363502;Gk;Bid;Gja1
GO:0031981	nuclear lumen	61	1279	0.998888	1	64557;171576;81819;316129;289777;293733;311723;79431;114482;117254;304648;64041;297339;25203;301701;361232;680097;360161;100912290;24571;50719;360559;102555453;266813;680522;25308;310344;364018;363198;501015;288242;24451;291145;684771;360243;58940;155430;500987;291100;24883;311336;307126;100360950;25515;502372;83516;500545;366126;291159;296137;259235;680531;294388;497672;309523;308100;64160;29230…	Bard1;Bub1b;Pax8;Uhrf1;Fignl1;Incenp;Sox18;Bhlhe40;Nek2;Prdx1;Asf1b;Birc5;Capg;Ccnb1;Ndc80;Pak1ip1;LOC680097;Nek6;LOC100912290;Muc1;Slc7a5;Fam64a;LOC102555453;Prrx1;Hist1h1b;Cstb;Plk4;Ncf2;Cenpq;C2cd4b;Chaf1b;Hmox1;Hist1h1a;Cdca5;Top2a;H2afz;Hey2;H2afx;Irf4;Wt1;Nusap1;Mcm10;LOC100360950;Plk1;Syce1;Ppargc1a;Cdca8;Spi1;Hist1h2ail;Bub1;Sdr9c7;Sapcd2;Stox1;Brca1;Kif20b;Acat2;Basp1;T;Rad51;Mms22l;Cenpa
GO:0016604	nuclear body	5	216	0.998895	1	24883;64160;360161;83516;499870	Wt1;Basp1;Nek6;Ppargc1a;Rad51
GO:0044428	nuclear part	82	1666	0.999358	1	64557;171576;81819;287633;289777;500545;293733;311723;64515;79431;114482;117254;304648;64041;297339;192211;301701;361232;83781;680097;360161;59103;24571;316129;84396;114097;361422;406864;360559;102555453;266813;680522;25308;310344;296368;100912290;25728;364018;363198;501015;288242;24451;291145;684771;360243;58940;155430;500987;291100;292935;363227;24883;311336;50719;64191;81511;100360950;307126;2…	Bard1;Bub1b;Pax8;Lrrc59;Fignl1;Cdca8;Incenp;Sox18;Cdc20;Bhlhe40;Nek2;Prdx1;Asf1b;Birc5;Capg;Prom2;Ndc80;Pak1ip1;Lgals3;LOC680097;Nek6;Ptges;Muc1;Uhrf1;Atp1b4;Ltc4s;Cotl1;Clic1;Fam64a;LOC102555453;Prrx1;Hist1h1b;Cstb;Plk4;Ube2c;LOC100912290;Apoe;Ncf2;Cenpq;C2cd4b;Chaf1b;Hmox1;Hist1h1a;Cdca5;Top2a;H2afz;Hey2;H2afx;Irf4;Htatip2;Nabp1;Wt1;Nusap1;Slc7a5;Dhcr7;Lat;LOC100360950;Mcm10;Cenpa;Plk1;Syce1;Pp…
GO:0005737	cytoplasm	422	7130	0.999382	1	65154;313840;29213;287610;360711;286894;286896;304860;497009;25060;360243;117558;292935;54282;298504;311374;83620;83627;83783;83781;259235;29452;292301;292306;300691;24834;24832;298068;117254;100360781;117524;24571;24375;361993;288504;289997;289993;365377;50719;89824;140939;24883;64191;24886;100360977;29168;100362805;362720;29143;170568;363091;289777;499302;25154;363790;192211;24599;24451;680945;…	Wisp1;Rmdn2;Tubb4a;Lpo;RGD1310335;Parm1;Sgpl1;Npl;Naaa;Hk3;Top2a;Mylk2;Htatip2;Padi1;Mfsd2a;Duoxa1;Cit;Galnt5;Sult1a1;Lgals3;Sdr9c7;Epas1;T;Rnaset2;Nnmt;Tk1;Thy1;Sec61b;Prdx1;LOC100360781;Ccnf;Muc1;Fuca1;Them5;Snx8;Dlgap5;Cdkn3;Trim72;Slc7a5;Chi3l1;Trim63;Wt1;Dhcr7;Tbxas1;LOC100360977;Ubd;Txndc5;Rrm2;Grn;Dmbt1;Myzap;Fignl1;Gal3st3;Pgr;Fbxo40;Prom2;Nos2;Hmox1;Sdf2l1;Cstb;Kcnma1;Selp;Ccr5;Clstn2;Se…
GO:0070013	intracellular organelle lumen	73	1531	0.999582	1	64557;171576;81819;316129;289777;293733;311723;79431;114482;117254;304648;64041;297339;83791;301701;361232;680097;360161;100912290;24571;58940;291675;81726;287633;360559;102555453;266813;680522;25308;310344;117099;364018;363198;100362805;113898;288242;24451;291145;684771;360243;81743;155430;500987;89813;291100;361993;292306;24883;311336;24787;307126;100360950;25515;502372;83516;500545;366126;2911…	Bard1;Bub1b;Pax8;Uhrf1;Fignl1;Incenp;Sox18;Bhlhe40;Nek2;Prdx1;Asf1b;Birc5;Capg;Fdps;Ndc80;Pak1ip1;LOC680097;Nek6;LOC100912290;Muc1;H2afz;Mzb1;Mvd;Lrrc59;Fam64a;LOC102555453;Prrx1;Hist1h1b;Cstb;Plk4;Bdh1;Ncf2;Cenpq;Txndc5;Prdx5;Chaf1b;Hmox1;Hist1h1a;Cdca5;Top2a;Pde2a;Hey2;H2afx;Pdk4;Irf4;Them5;Rnaset2;Wt1;Nusap1;Sod2;Mcm10;LOC100360950;Plk1;Syce1;Ppargc1a;Cdca8;Spi1;Hist1h2ail;Bub1;Sdr9c7;Sapcd2;S…
GO:0043233	organelle lumen	73	1538	0.999642	1	64557;171576;81819;316129;289777;293733;311723;79431;114482;117254;304648;64041;297339;83791;301701;361232;680097;360161;100912290;24571;58940;291675;81726;287633;360559;102555453;266813;680522;25308;310344;117099;364018;363198;100362805;113898;288242;24451;291145;684771;360243;81743;155430;500987;89813;291100;361993;292306;24883;311336;24787;307126;100360950;25515;502372;83516;500545;366126;2911…	Bard1;Bub1b;Pax8;Uhrf1;Fignl1;Incenp;Sox18;Bhlhe40;Nek2;Prdx1;Asf1b;Birc5;Capg;Fdps;Ndc80;Pak1ip1;LOC680097;Nek6;LOC100912290;Muc1;H2afz;Mzb1;Mvd;Lrrc59;Fam64a;LOC102555453;Prrx1;Hist1h1b;Cstb;Plk4;Bdh1;Ncf2;Cenpq;Txndc5;Prdx5;Chaf1b;Hmox1;Hist1h1a;Cdca5;Top2a;Pde2a;Hey2;H2afx;Pdk4;Irf4;Them5;Rnaset2;Wt1;Nusap1;Sod2;Mcm10;LOC100360950;Plk1;Syce1;Ppargc1a;Cdca8;Spi1;Hist1h2ail;Bub1;Sdr9c7;Sapcd2;S…
GO:0031974	membrane-enclosed lumen	76	1593	0.999665	1	64557;171576;81819;316129;289777;293733;311723;79431;114482;117254;304648;64041;297339;83791;301701;361232;680097;360161;100912290;24571;58940;291675;81726;287633;360559;102555453;266813;680522;25308;310344;117099;364018;363198;64160;100362805;113898;288242;24451;311336;100363502;291145;684771;360243;81743;155430;500987;89813;291100;361993;292306;24883;25557;24787;307126;100360950;25515;502372;83…	Bard1;Bub1b;Pax8;Uhrf1;Fignl1;Incenp;Sox18;Bhlhe40;Nek2;Prdx1;Asf1b;Birc5;Capg;Fdps;Ndc80;Pak1ip1;LOC680097;Nek6;LOC100912290;Muc1;H2afz;Mzb1;Mvd;Lrrc59;Fam64a;LOC102555453;Prrx1;Hist1h1b;Cstb;Plk4;Bdh1;Ncf2;Cenpq;Basp1;Txndc5;Prdx5;Chaf1b;Hmox1;Nusap1;LOC100363502;Hist1h1a;Cdca5;Top2a;Pde2a;Hey2;H2afx;Pdk4;Irf4;Them5;Rnaset2;Wt1;Star;Sod2;Mcm10;LOC100360950;Plk1;Syce1;Ppargc1a;Cdca8;Spi1;Hist1h2…
GO:0005681	spliceosomal complex	1	124	0.999768	1	83781	Lgals3
GO:0005739	mitochondrion	62	1384	0.999861	1	29597;25330;690745;29592;293650;406864;25154;313840;54237;64625;117254;66021;25524;83791;25027;691431;29692;365345;25059;24533;24890;79129;117099;287633;83781;81743;298282;113898;24479;365042;25060;287442;79223;308099;89813;282838;361993;191575;25557;24787;29221;685232;313211;113976;24383;50671;171142;298606;24191;25086;89784;314360;499870;497672;100363502;29143;287877;362474;498840;24392;308100;…	P2ry2;Lipe;Marc1;Bcat1;Tcirg1;Clic1;Pgr;Rmdn2;Cdk1;Bid;Prdx1;Cybb;Psap;Fdps;Slc16a1;Slc25a33;Pla2g2a;Cyb5r2;Hk2;Ldha;Esr1;Cyba;Bdh1;Lrrc59;Lgals3;Pde2a;Oma1;Prdx5;Idh1;Rab32;Hk3;Tmem256;Gk;Fndc1;Pdk4;Gm2a;Them5;Nme1;Star;Sod2;Arg1;Atp6v1a;Nipsnap3b;Acsl4;Gapdh;Fasn;Lbp;Slc25a34;Aldoc;Cyp2e1;Idi1;Galc;Rad51;Brca1;LOC100363502;Grn;Pycr1;Adhfe1;Tmem173;Gja1;Acat2;Mthfd2
GO:0005840	ribosome	6	301	0.999946	1	100363469;102555453;361923;100360781;299106;81772	LOC100363469;LOC102555453;Rpl22l1;LOC100360781;Rpl10l;Rps9
GO:0043231	intracellular membrane-bounded organelle	414	7234	0.999953	1	313840;689399;29213;361232;81819;286894;286896;361623;296368;497009;54264;25060;360243;117558;292935;311374;83620;83627;83781;259235;29452;100365043;292301;292306;25524;304951;24832;298068;117254;364754;117524;25448;50592;365298;24571;691857;24375;100910554;361993;288504;289997;365377;50719;89824;140939;24883;64191;24886;100360977;307106;29168;100362805;362720;29143;170568;289777;302972;499302;19…	Rmdn2;Cenpw;Tubb4a;Pak1ip1;Pax8;Parm1;Sgpl1;Trim66;Ube2c;Naaa;Mafb;Hk3;Top2a;Mylk2;Htatip2;Duoxa1;Cit;Galnt5;Lgals3;Sdr9c7;Epas1;LOC100365043;T;Rnaset2;Psap;Nuf2;Thy1;Sec61b;Prdx1;Fzd8;Ccnf;Cenpi;Gria1;Alpk3;Muc1;Pygo1;Fuca1;LOC100910554;Them5;Snx8;Dlgap5;Trim72;Slc7a5;Chi3l1;Trim63;Wt1;Dhcr7;Tbxas1;LOC100360977;Sfmbt2;Ubd;Txndc5;Rrm2;Grn;Dmbt1;Fignl1;Amdhd2;Gal3st3;Prom2;Nos2;Hmox1;Hist1h1a;Sdf2…
GO:0005634	nucleus	229	4385	0.999994	1	85497;81819;311723;79431;689399;312897;29213;308761;361232;25503;313211;100912290;50719;361422;360492;25334;360559;306970;246118;361623;292935;296368;502125;363198;54264;502129;78960;266775;360243;298850;65161;291100;191575;363227;307126;100360950;25510;25515;24383;50672;170897;291159;294286;83781;259235;680531;79126;306962;305984;691488;54296;360621;25589;292301;29452;366949;305827;313108;316129…	Klf15;Pax8;Sox18;Bhlhe40;Cenpw;Msc;Tubb4a;Prc1;Pak1ip1;Ocm2;Nipsnap3b;LOC100912290;Slc7a5;Cotl1;Hn1l;Bhlha15;Fam64a;Hist1h2an;Tubb3;Trim66;Htatip2;Ube2c;Hist1h2ah;Cenpq;Mafb;Hist1h2ai;Prx;Serpinb10;Top2a;Cenpa;Litaf;Irf4;Nme1;Nabp1;Mcm10;LOC100360950;Pcp4;Plk1;Gapdh;Ednrb;Sphk1;Hist1h2ail;Kifc1;Lgals3;Sdr9c7;Sapcd2;Cfi;Hist1h2ac;Cdca2;Hist3h2bb;Rgs7;Cdc6;Kdr;T;Epas1;Mafa;Wdhd1;Mms22l;Uhrf1;Clic1;…
GO:0043229	intracellular organelle	456	8083	0.999995	1	313840;689399;29213;361232;81819;294043;286894;286896;361623;296368;497009;54264;25060;360243;117558;292935;311374;83620;83627;83781;259235;29452;100365043;292301;292306;25524;304951;24832;298068;117254;100360781;117524;25448;50592;365298;24571;691857;24375;100910554;361993;288504;289997;365377;50719;89824;140939;24883;64191;24886;100360977;307106;29168;100362805;362720;29143;170568;363091;289777…	Rmdn2;Cenpw;Tubb4a;Pak1ip1;Pax8;Sorcs3;Parm1;Sgpl1;Trim66;Ube2c;Naaa;Mafb;Hk3;Top2a;Mylk2;Htatip2;Duoxa1;Cit;Galnt5;Lgals3;Sdr9c7;Epas1;LOC100365043;T;Rnaset2;Psap;Nuf2;Thy1;Sec61b;Prdx1;LOC100360781;Ccnf;Cenpi;Gria1;Alpk3;Muc1;Pygo1;Fuca1;LOC100910554;Them5;Snx8;Dlgap5;Trim72;Slc7a5;Chi3l1;Trim63;Wt1;Dhcr7;Tbxas1;LOC100360977;Sfmbt2;Ubd;Txndc5;Rrm2;Grn;Dmbt1;Myzap;Fignl1;Amdhd2;Gal3st3;Prom2;Nos…
GO:0044424	intracellular part	525	9242	0.999998	1	65154;313840;689399;29213;287610;361232;81819;294043;360711;286894;286896;361623;304860;296368;497009;54264;25060;360243;301086;117558;292935;54282;298504;54289;83620;83627;83783;83781;259235;29452;100365043;292301;292306;300691;304951;24834;24832;298068;117254;100360781;117524;25448;50592;365298;24571;56765;24375;100910554;117099;288504;289997;289993;365377;50719;89824;140939;24883;64191;24886;1…	Wisp1;Rmdn2;Cenpw;Tubb4a;Lpo;Pak1ip1;Pax8;Sorcs3;RGD1310335;Parm1;Sgpl1;Trim66;Npl;Ube2c;Naaa;Mafb;Hk3;Top2a;Xcr1;Mylk2;Htatip2;Padi1;Mfsd2a;Rgs1;Cit;Galnt5;Sult1a1;Lgals3;Sdr9c7;Epas1;LOC100365043;T;Rnaset2;Nnmt;Nuf2;Tk1;Thy1;Sec61b;Prdx1;LOC100360781;Ccnf;Cenpi;Gria1;Alpk3;Muc1;Plvap;Fuca1;LOC100910554;Bdh1;Snx8;Dlgap5;Cdkn3;Trim72;Slc7a5;Chi3l1;Trim63;Wt1;Dhcr7;Tbxas1;LOC100360977;Sfmbt2;Ubd;T…
GO:0005622	intracellular	536	9486	0.999999	1	65154;313840;689399;29213;287610;361232;81819;294043;360711;286894;286896;361623;304860;296368;497009;54264;25060;360243;301086;117558;292935;54282;298504;54289;83620;83627;83783;83781;259235;29452;100365043;292301;292306;300691;304951;24834;24832;298068;117254;100360781;117524;25448;50592;365298;24571;56765;24375;100910554;117099;288504;289997;291597;289993;365377;50719;89824;140939;24883;64191;…	Wisp1;Rmdn2;Cenpw;Tubb4a;Lpo;Pak1ip1;Pax8;Sorcs3;RGD1310335;Parm1;Sgpl1;Trim66;Npl;Ube2c;Naaa;Mafb;Hk3;Top2a;Xcr1;Mylk2;Htatip2;Padi1;Mfsd2a;Rgs1;Cit;Galnt5;Sult1a1;Lgals3;Sdr9c7;Epas1;LOC100365043;T;Rnaset2;Nnmt;Nuf2;Tk1;Thy1;Sec61b;Prdx1;LOC100360781;Ccnf;Cenpi;Gria1;Alpk3;Muc1;Plvap;Fuca1;LOC100910554;Bdh1;Snx8;Dlgap5;Trim36;Cdkn3;Trim72;Slc7a5;Chi3l1;Trim63;Wt1;Dhcr7;Tbxas1;LOC100360977;Sfmbt…
GO:1902494	catalytic complex	17	663	0.999999	1	64557;302976;155430;79129;64515;117524;296368;24212;24213;24333;116720;301518;66021;84396;29639;497672;282838	Bard1;Noxo1;Hey2;Cyba;Cdc20;Ccnf;Ube2c;Atp1a2;Atp1a3;Eno1;Pik3c2g;Prkag3;Cybb;Atp1b4;Fxyd2;Brca1;Gm2a
GO:1990234	transferase complex	7	453	1	1	64557;116720;64515;301518;117524;497672;296368	Bard1;Pik3c2g;Cdc20;Prkag3;Ccnf;Brca1;Ube2c
GO:0044451	nucleoplasm part	7	461	1	1	83516;155430;24883;64160;360161;499870;313108	Ppargc1a;Hey2;Wt1;Basp1;Nek6;Rad51;Mms22l
GO:0005654	nucleoplasm	11	592	1	1	360243;155430;24883;309523;64160;83516;81819;360161;288242;499870;313108	Top2a;Hey2;Wt1;Kif20b;Basp1;Ppargc1a;Pax8;Nek6;Chaf1b;Rad51;Mms22l
GO:0005623	cell	643	11622	1	1	684984;65154;313840;689399;679975;29213;287610;361232;81819;294043;360711;286894;286896;361623;304860;296368;315611;315615;497009;54264;500906;25060;360243;301086;117558;292935;25349;54282;298504;60350;25694;54289;83620;361537;83627;83783;298857;83781;259235;29452;306636;100365043;292301;292306;300691;29242;24834;24832;298068;117254;100360781;117524;117257;25448;50592;365298;117258;24571;56765;24…	Cd300lg;Wisp1;Rmdn2;Cenpw;Gpr183;Tubb4a;Lpo;Pak1ip1;Pax8;Sorcs3;RGD1310335;Parm1;Sgpl1;Trim66;Npl;Ube2c;Scn4b;Dscaml1;Naaa;Mafb;Cyth4;Hk3;Top2a;Xcr1;Mylk2;Htatip2;Scn2b;Padi1;Mfsd2a;Cd14;Has2;Rgs1;Cit;Tyrobp;Galnt5;Sult1a1;Gpr113;Lgals3;Sdr9c7;Epas1;Efnb2;LOC100365043;T;Rnaset2;Nnmt;Car4;Tk1;Thy1;Sec61b;Prdx1;LOC100360781;Ccnf;Gpr176;Cenpi;Gria1;Alpk3;Cntn1;Muc1;Plvap;Fuca1;LOC100910554;Bdh1;Slc2…
GO:0044464	cell part	640	11598	1	1	684984;65154;313840;689399;679975;29213;287610;361232;81819;294043;360711;286894;286896;361623;304860;296368;315611;315615;497009;54264;500906;25060;360243;301086;117558;292935;25349;54282;298504;60350;25694;54289;83620;361537;83627;83783;298857;83781;259235;29452;306636;100365043;292301;292306;300691;29242;24834;24832;298068;117254;100360781;117524;117257;25448;50592;365298;117258;24571;56765;24…	Cd300lg;Wisp1;Rmdn2;Cenpw;Gpr183;Tubb4a;Lpo;Pak1ip1;Pax8;Sorcs3;RGD1310335;Parm1;Sgpl1;Trim66;Npl;Ube2c;Scn4b;Dscaml1;Naaa;Mafb;Cyth4;Hk3;Top2a;Xcr1;Mylk2;Htatip2;Scn2b;Padi1;Mfsd2a;Cd14;Has2;Rgs1;Cit;Tyrobp;Galnt5;Sult1a1;Gpr113;Lgals3;Sdr9c7;Epas1;Efnb2;LOC100365043;T;Rnaset2;Nnmt;Car4;Tk1;Thy1;Sec61b;Prdx1;LOC100360781;Ccnf;Gpr176;Cenpi;Gria1;Alpk3;Cntn1;Muc1;Plvap;Fuca1;LOC100910554;Bdh1;Slc2…
GO:0030529	ribonucleoprotein complex	10	636	1	1	100363469;24383;102555453;361923;100360781;497672;299106;310395;83781;81772	LOC100363469;Gapdh;LOC102555453;Rpl22l1;LOC100360781;Brca1;Rpl10l;Ccr4;Lgals3;Rps9
